# Supplementary material for: Single-cell transcriptomics reveals specific RNA editing signatures in the human brain
Source: PubMed Central journal article supplement (PMC5435858; doi:10.1261/rna.058271.116), 2017-06
Supplement: supp_058271.116_Supplemental_Table_1.pdf [file supp_058271.116_Supplemental_Table_1.pdf]

| SRARun     | Group      | Reads   | trimG   | rRNA    | STARin  | MapAsUnique | %Mapped     | READ_PAIR | OPTICAL_DUPLICATES | PERCENT DUPLICATION | ESTIMATED LIBRARY SIZE | PCT_RIBOSOMAL BASES | PCT_CODING BASES | PCT_UTR_BASES | PCT_INTRONIC BASES | PCT_INTERGENIC BASES | PCT_MRNA BASES | PCT_USABLE BASES | MEDIAN CV COVERAGE |
|------------|------------|---------|---------|---------|---------|-------------|-------------|-----------|--------------------|---------------------|------------------------|---------------------|------------------|---------------|--------------------|----------------------|----------------|------------------|--------------------|
| SRR1974557 | astrocytes | 2506473 | 2407820 | 2232039 | 2232039 | 1923413     | 86.17291185 | 0         | 0                  | 0.191328            | 4362512                | 0                   | 0.061615         | 0.165533      | 0.577088           | 0.195764             | 0.225748       | 0.225473         | 2.2764             |
| SRR1974604 | astrocytes | 2601321 | 2463078 | 2313431 | 2313431 | 1940442     | 83.8723688  | 0         | 0                  | 0.103938            | 8675910                | 0.000002            | 0.196686         | 0.27291       | 0.421706           | 0.108696             | 0.469596       | 0.465168         | 0.985004           |
| SRR1974610 | astrocytes | 2830982 | 2678538 | 2498536 | 2498536 | 2143535     | 85.79163958 | 0         | 0                  | 0.097785            | 10233672               | 0                   | 0.087364         | 0.138157      | 0.601855           | 0.172624             | 0.225521       | 0.223463         | 1.300878           |
| SRR1974637 | astrocytes | 4248628 | 4029324 | 3791034 | 3791034 | 3147101     | 83.01431747 | 0         | 0                  | 0.130806            | 10956017               | 0.000001            | 0.191779         | 0.201683      | 0.47559            | 0.130946             | 0.393462       | 0.38978          | 1.230047           |
| SRR1974641 | astrocytes | 4987406 | 4699241 | 4394381 | 4394381 | 3362601     | 76.52047012 | 0         | 0                  | 0.16068             | 7814360                | 0                   | 0.187349         | 0.279346      | 0.429201           | 0.130773             | 0.440026       | 0.43575          | 1.711261           |
| SRR1974647 | astrocytes | 4267586 | 4024644 | 3764739 | 3764739 | 3135038     | 83.27317433 | 0         | 0                  | 0.131709            | 10831652               | 0.000001            | 0.137062         | 0.220945      | 0.502493           | 0.139498             | 0.358008       | 0.354647         | 1.33619            |
| SRR1974651 | astrocytes | 3750049 | 3521254 | 3274232 | 3274232 | 2691176     | 82.19258745 | 0         | 0                  | 0.132023            | 9273724                | 0                   | 0.185427         | 0.285459      | 0.4008             | 0.128314             | 0.470887       | 0.465675         | 1.255549           |
| SRR1974653 | astrocytes | 3712300 | 3480502 | 3240812 | 3240812 | 2783231     | 85.88066818 | 0         | 0                  | 0.108558            | 11873518               | 0.000002            | 0.159137         | 0.243314      | 0.476613           | 0.120935             | 0.402451       | 0.39822          | 0.874479           |
| SRR1974664 | astrocytes | 1987160 | 1620191 | 1502602 | 1502602 | 867746      | 57.74955571 | 0         | 0                  | 0.095809            | 4234393                | 0.000001            | 0.062948         | 0.118696      | 0.679846           | 0.181644             | 0.179696       | 0.279683         | 0.874479           |
| SRR1974670 | astrocytes | 1955412 | 1631102 | 1499653 | 1499653 | 1017013     | 67.8165549  | 0         | 0                  | 0.110979            | 4236334                | 0                   | 0.078677         | 0.177356      | 0.576177           | 0.167791             | 0.256032       | 0.254285         | 2.67336            |
| SRR1974672 | astrocytes | 1771521 | 1490268 | 1369387 | 1369387 | 934614      | 68.25053838 | 0         | 0                  | 0.111701            | 3865853                | 0                   | 0.055833         | 0.19536       | 0.589031           | 0.159776             | 0.251193       | 0.249446         | 2.749757           |
| SRR1974678 | astrocytes | 6047654 | 5701966 | 5506624 | 5506624 | 4004410     | 72.71987337 | 0         | 0                  | 0.121064            | 15182086               | 0.000002            | 0.171041         | 0.208511      | 0.507608           | 0.112839             | 0.379552       | 0.375095         | 0.87735            |
| SRR1974679 | astrocytes | 5492700 | 5180462 | 4998711 | 4998711 | 3576358     | 71.54560444 | 0         | 0                  | 0.100457            | 16598595               | 0.000001            | 0.132515         | 0.139143      | 0.604401           | 0.12394              | 0.271658       | 0.26852          | 1.061284           |
| SRR1974682 | astrocytes | 5628943 | 5265809 | 5034550 | 5034550 | 3689746     | 73.2094055  | 0         | 0                  | 0.106353            | 16086501               | 0.000019            | 0.124035         | 0.149674      | 0.565638           | 0.160631             | 0.273711       | 0.27045          | 0.99941            |
| SRR1974688 | astrocytes | 5329477 | 5001129 | 4819598 | 4819598 | 3479052     | 72.18552253 | 0         | 0                  | 0.131373            | 12063002               | 0.000004            | 0.150484         | 0.205489      | 0.512486           | 0.131536             | 0.355973       | 0.352053         | 1.059289           |
| SRR1974689 | astrocytes | 3659877 | 3391928 | 3238324 | 3238324 | 2335731     | 72.1277735  | 0         | 0                  | 0.129127            | 8251663                | 0                   | 0.132763         | 0.200122      | 0.534924           | 0.132192             | 0.332883       | 0.332014         | 1.18792            |
| SRR1974692 | astrocytes | 7653665 | 7396987 | 7152032 | 7152032 | 5136631     | 70.80659986 | 0         | 0                  | 0.139173            | 16703469               | 0                   | 0.123364         | 0.151814      | 0.565802           | 0.153828             | 0.275138       | 0.273148         | 1.18792            |
| SRR1974693 | astrocytes | 4961238 | 4682993 | 4517788 | 4517788 | 3186009     | 70.49930187 | 0         | 0.000009           | 0.130608            | 11105476               | 0.000009            | 0.127073         | 0.158187      | 0.40498            | 0.140496             | 0.28526        | 0.281728         | 1.085358           |
| SRR1974698 | astrocytes | 5855636 | 5507794 | 5290649 | 5290649 | 3699685     | 69.28755443 | 0         | 0                  | 0.129626            | 13014763               | 0.000022            | 0.12843          | 0.159678      | 0.582373           | 0.128408             | 0.288108       | 0.284774         | 1.217026           |
| SRR1974699 | astrocytes | 5608933 | 5259140 | 5024174 | 5024174 | 3510691     | 69.87598359 | 0         | 0                  | 0.126755            | 12659754               | 0.000005            | 0.099344         | 0.134276      | 0.65767            | 0.108706             | 0.23362        | 0.23076          | 1.578215           |
| SRR1974701 | astrocytes | 6609556 | 6256255 | 6032216 | 6032216 | 4347178     | 72.06602018 | 0         | 0                  | 0.123086            | 16186565               | 0.000017            | 0.166037         | 0.191753      | 0.533894           | 0.108304             | 0.357785       | 0.353541         | 0.931542           |
| SRR1974703 | astrocytes | 5952629 | 5591965 | 5393199 | 5393199 | 3703660     | 68.7278585  | 0         | 0                  | 0.134001            | 12563199               | 0                   | 0.141762         | 0.158604      | 0.553104           | 0.146591             | 0.290366       | 0.296791         | 1.420396           |
| SRR1974715 | astrocytes | 7799671 | 7374799 | 7086011 | 7086011 | 4914925     | 69.3609564  | 0         | 0                  | 0.142416            | 15858130               | 0.000006            | 0.180094         | 0.226777      | 0.465175           | 0.127949             | 0.406871       | 0.402061         | 1.020043           |
| SRR1974717 | astrocytes | 6083848 | 5713985 | 5458426 | 5458426 | 3573399     | 65.46574049 | 0         | 0                  | 0.147399            | 10904512               | 0.000001            | 0.09994          | 0.137833      | 0.608389           | 0.153838             | 0.237773       | 0.234928         | 1.671169           |
| SRR1974720 | astrocytes | 4366007 | 4069231 | 3903615 | 3903615 | 2776386     | 71.12345864 | 0         | 0                  | 0.104322            | 12372726               | 0                   | 0.076862         | 0.133478      | 0.655202           | 0.134458             | 0.21034        | 0.207982         | 1.401961           |
| SRR1974721 | astrocytes | 5093737 | 4777844 | 4560389 | 4560389 | 2717041     | 59.57914994 | 0         | 0                  | 0.142348            | 8620775                | 0                   | 0.088508         | 0.130208      | 0.614768           | 0.166516             | 0.218716       | 0.216118         | 2.072192           |
| SRR1974722 | astrocytes | 6770615 | 6405817 | 6145558 | 6145558 | 4145772     | 67.45965134 | 0         | 0                  | 0.139866            | 13410926               | 0.000006            | 0.152062         | 0.188622      | 0.5243             | 0.135009             | 0.340694       | 0.336732         | 1.119786           |
| SRR1974723 | astrocytes | 6679883 | 6252187 | 5996266 | 5996266 | 4303111     | 71.76317728 | 0         | 0                  | 0.104831            | 16844014               | 0.00003             | 0.13652          | 0.162008      | 0.620038           | 0.24135              | 0.238455       | 0.238455         | 1.106368           |
| SRR1974725 | astrocytes | 5743694 | 5331514 | 5091842 | 5091842 | 3499458     | 68.72675939 | 0         | 0                  | 0.126529            | 12642220               | 0.000006            | 0.096672         | 0.166751      | 0.554668           | 0.181904             | 0.263423       | 0.260162         | 1.398091           |
| SRR1974726 | astrocytes | 4587919 | 4274311 | 4093120 | 4093120 | 2981628     | 72.84487139 | 0         | 0                  | 0.115787            | 11670984               | 0                   | 0.126839         | 0.159772      | 0.594148           | 0.119241             | 0.286611       | 0.283174         | 1.14928            |
| SRR1974727 | astrocytes | 5251312 | 4877377 | 4457791 | 4457791 | 2330606     | 52.28163456 | 0         | 0                  | 0.131139            | 2916438                | 0                   | 0.11121          | 0.140158      | 0.374469           | 0.374163             | 0.251368       | 0.248075         | 2.09666            |
| SRR1974728 | astrocytes | 6745907 | 6371677 | 6117607 | 6117607 | 4099346     | 67.00897916 | 0         | 0                  | 0.158941            | 11493218               | 0.000001            | 0.15544          | 0.060673      | 0.51614            | 0.241813             | 0.239109       | 0.239109         | 1.650429           |
| SRR1974731 | astrocytes | 8084208 | 7599730 | 7325598 | 7325598 | 4971404     | 67.86345633 | 0         | 0                  | 0.155704            | 14266266               | 0                   | 0.130749         | 0.164403      | 0.595687           | 0.10916              | 0.295153       | 0.291788         | 1.21244            |
| SRR1974732 | astrocytes | 7873178 | 7423009 | 7147946 | 7147946 | 5278402     | 73.84501786 | 0         | 0                  | 0.14863             | 21191929               | 0.000001            | 0.103808         | 0.11935       | 0.639303           | 0.137538             | 0.223158       | 0.220706         | 1.008854           |
| SRR1974733 | astrocytes | 5634272 | 5358419 | 5196183 | 5196183 | 3685440     | 70.9259085  | 0         | 0                  | 0.139919            | 19196000               | 0                   | 0.117815         | 0.14998       | 0.61884            | 0.113365             | 0.267795       | 0.264628         | 1.511127           |
| SRR1974734 | astrocytes | 4133301 | 3906104 | 3744213 | 3744213 | 2338743     | 62.46287271 | 0         | 0                  | 0.134899            | 7868195                | 0.000003            | 0.09161          | 0.161128      | 0.565111           | 0.182148             | 0.252738       | 0.249562         | 1.82627            |
| SRR1974736 | astrocytes | 3803216 | 3553102 | 3417205 | 3417205 | 2470730     | 72.3026567  | 0         | 0                  | 0.109993            | 10396747               | 0.000001            | 0.129479         | 0.195481      | 0.549385           | 0.125655             | 0.32496        | 0.320922         | 1.017808           |
| SRR1974737 | astrocytes | 6454831 | 6070296 | 5838587 | 5838587 | 3727584     | 63.84394032 | 0         | 0                  | 0.154895            | 10760298               | 0                   | 0.210717         | 0.208177      | 0.478998           | 0.102108             | 0.418894       | 0.41374          | 1.290734           |
| SRR1974738 | astrocytes | 4290579 | 4055311 | 3840904 | 3840904 | 2477624     | 64.50627248 | 0         | 0                  | 0.13591             | 8273380                | 0                   | 0.117779         | 0.166495      | 0.527367           | 0.188359             | 0.284274       | 0.280873         | 1.675113           |
| SRR1974739 | astrocytes | 6471254 | 6097682 | 5898608 | 5898608 | 4390064     | 74.42542376 | 0         | 0                  | 0.122766            | 16390324               | 0.000002            | 0.0993274        | 0.120006      | 0.643523           | 0.143197             | 0.21328        | 0.210835         | 1.12386            |
| SRR1974740 | astrocytes | 5666331 | 5235212 | 4989398 | 4989398 | 3387758     | 67.77687571 | 0         | 0                  | 0.134767            | 11148494               | 0                   | 0.090523         | 0.133094      | 0.629266           | 0.147116             | 0.223618       | 0.220793         | 1.644696           |
| SRR1974741 | astrocytes | 6104836 | 5763311 | 5545294 | 5545294 | 3677408     | 66.31583465 | 0         | 0                  | 0.13805             | 12070391               | 0                   | 0.155963         | 0.173666      | 0.515852           | 0.118619             | 0.329529       | 0.325528         | 1.313732           |
| SRR1974743 | astrocytes | 8409889 | 7980097 | 7714629 | 7714629 | 5199008     | 67.2865539  | 0         | 0                  | 0.166519            | 13808760               | 0                   | 0.179623         | 0.204566      | 0.515583           | 0.100229             | 0.384188       | 0.379926         | 1.220201           |
| SRR1974744 | astrocytes | 5553866 | 5250963 | 5095037 | 5095037 | 3183966     | 62.49157759 | 0         | 0                  | 0.162194            | 8726001                | 0                   | 0.187914         | 0.178378      | 0.520453           | 0.113255             | 0.366292       | 0.361886         | 1.529301           |
| SRR1974745 | astrocytes | 7889393 | 7448214 | 7189219 | 7189219 | 5220341     | 72.61346469 | 0         | 0                  | 0.144017            | 16344881               | 0                   | 0.168307         | 0.181209      | 0.545426           | 0.105058             | 0.349516       | 0.345517         | 1.025288           |
| SRR1974750 | astrocytes | 3756993 | 3526754 | 3365167 | 3365167 | 2499184     | 74.2662697  | 0         | 0                  | 0.098019            | 11912183               | 0                   | 0.198782         | 0.260365      | 0.421429           | 0.119363             | 0.459147       | 0.45359          | 0.883131           |
| SRR1974751 | astrocytes | 7390496 | 6900350 | 6632792 | 6632792 | 4906260     | 73.96975512 | 0         | 0                  | 0.119653            | 18840496               | 0                   | 0.136715         | 0.174518      | 0.5686             | 0.120167             | 0.311233       | 0.307756         | 0.907338           |
| SRR1974753 | astrocytes | 2709438 | 2561771 | 2448000 | 2448000 | 1339268     | 54.70866013 | 0         | 0                  | 0.133125            | 4574438                | 0                   | 0.394853         | 0.1713        | 0.336204           | 0.097642             | 0.566154       | 0.577787         | 1.399413           |
| SRR1974754 | astrocytes | 7155864 | 6774432 | 6504017 | 6504017 | 4215013     | 64.80628818 | 0         | 0                  | 0.148435            | 12761610               | 0.000001            | 0.18437          | 0.22463       | 0.452226           | 0.138774             | 0.404316       | 0.404316         | 1.227029           |
| SRR1974814 | astrocytes | 1307265 | 1230282 | 1138430 | 1138430 | 861213      | 84.5134515  | 0         | 0                  | 0.044595            | 10464160               | 0.000051            | 0.112821         | 0.229464      | 0.5369             | 0.120764             | 0.342285       | 0.339029         | 1.586665           |
| SRR1974840 | astrocytes | 3441343 | 3290147 | 3064859 | 3064859 | 2547971     | 83.13501525 | 0         | 0                  | 0.116035            | 10112425               | 0.000006            | 0.145013         | 0.259398      | 0.477067           |                      |                |                  |                    |

|            |                 |         |         |         |         |         |             |   |          |          |          |          |          |          |          |          |          |          |
|------------|-----------------|---------|---------|---------|---------|---------|-------------|---|----------|----------|----------|----------|----------|----------|----------|----------|----------|----------|
| SRR1974781 | endothelial     | 1286323 | 1189909 | 1123299 | 1123299 | 978607  | 87,11901284 | 0 | 0,075813 | 6123596  | 0,000009 | 0,211096 | 0,329295 | 0,333779 | 0,125821 | 0,540391 | 0,535482 | 1,347518 |
| SRR1974784 | endothelial     | 1420241 | 1327961 | 1221002 | 1221002 | 1079544 | 88,41459719 | 0 | 0,064441 | 8012355  | 0,000001 | 0,18416  | 0,283899 | 0,423703 | 0,468059 | 0,468059 | 0,468059 | 1,196209 |
| SRR1974789 | endothelial     | 1543335 | 1447582 | 1350221 | 1350221 | 915075  | 67,7723877  | 0 | 0,075198 | 5775410  | 0        | 0,142163 | 0,186299 | 0,463116 | 0,208422 | 0,328462 | 0,32568  | 1,782876 |
| SRR1974794 | endothelial     | 1259609 | 1173084 | 1082271 | 1082271 | 65630   | 60,6714954  | 0 | 0,059426 | 5303639  | 0,000006 | 0,126681 | 0,135688 | 0,596264 | 0,141361 | 0,262369 | 0,260174 | 2,002586 |
| SRR1974798 | endothelial     | 1879806 | 1772664 | 1672168 | 1672168 | 1046837 | 62,60357811 | 0 | 0,0684   | 7299204  | 0,000026 | 0,156873 | 0,194926 | 0,498509 | 0,149666 | 0,351799 | 0,348913 | 1,731965 |
| SRR1974765 | fetal_quiescent | 2153999 | 1895101 | 1779749 | 1779749 | 1448026 | 81,36124813 | 0 | 0,060572 | 11465196 | 0        | 0,084532 | 0,126472 | 0,614495 | 0,174501 | 0,211004 | 0,210147 | 1,739087 |
| SRR1974893 | fetal_quiescent | 2920387 | 2508253 | 2336964 | 2336964 | 2040726 | 87,32380987 | 0 | 0,096762 | 9853300  | 0        | 0,095036 | 0,169016 | 0,640518 | 0,095431 | 0,264051 | 0,263038 | 1,566341 |
| SRR1974895 | fetal_quiescent | 2997868 | 2623222 | 2433794 | 2433794 | 1497079 | 61,51214934 | 0 | 0,21584  | 2948625  | 0        | 0,095814 | 0,240098 | 0,553473 | 0,110615 | 0,335912 | 0,334634 | 2,395314 |
| SRR1974897 | fetal_quiescent | 2962015 | 2551671 | 2377042 | 2377042 | 1962167 | 82,5655163  | 0 | 0,095055 | 9658430  | 0,000001 | 0,074044 | 0,126592 | 0,706718 | 0,092645 | 0,200637 | 0,199902 | 2,052896 |
| SRR1974898 | fetal_quiescent | 2566001 | 2226240 | 2069174 | 2069174 | 1676012 | 80,99908466 | 0 | 0,137858 | 5506206  | 0        | 0,09072  | 0,219202 | 0,603867 | 0,086211 | 0,309922 | 0,30886  | 1,850442 |
| SRR1974899 | fetal_quiescent | 2774219 | 2366981 | 2214661 | 2214661 | 1505236 | 67,96688071 | 0 | 0,172917 | 3834764  | 0        | 0,204905 | 0,391802 | 0,313388 | 0,089905 | 0,596707 | 0,594285 | 1,832359 |
| SRR1974901 | fetal_quiescent | 2013009 | 1744472 | 1649674 | 1649674 | 1359817 | 82,42943757 | 0 | 0,056122 | 11657289 | 0        | 0,223714 | 0,299636 | 0,3538   | 0,523349 | 0,521386 | 0,521386 | 0,973056 |
| SRR1974902 | fetal_quiescent | 1659842 | 1471238 | 1401512 | 1401512 | 1181177 | 84,27876465 | 0 | 0,039483 | 14561483 | 0        | 0,1253   | 0,176284 | 0,597787 | 0,10063  | 0,301583 | 0,30068  | 1,152132 |
| SRR1974903 | fetal_quiescent | 2391240 | 2112188 | 2004850 | 2004850 | 1644051 | 82,00369105 | 0 | 0,109092 | 6976543  | 0        | 0,237648 | 0,384586 | 0,269198 | 0,108568 | 0,622233 | 0,620122 | 0,944165 |
| SRR1974904 | fetal_quiescent | 1190122 | 1034938 | 976871  | 976871  | 688042  | 70,43325065 | 0 | 0,058286 | 5670676  | 0        | 0,246172 | 0,340575 | 0,330263 | 0,082989 | 0,586747 | 0,584427 | 1,175544 |
| SRR1974905 | fetal_quiescent | 1701586 | 1495602 | 1415078 | 1415078 | 1259560 | 89,00993443 | 0 | 0,036635 | 16768189 | 0,000001 | 0,12476  | 0,185459 | 0,574057 | 0,151722 | 0,310219 | 0,309136 | 0,972149 |
| SRR1974906 | fetal_quiescent | 2294307 | 1992267 | 1838523 | 1838523 | 1523018 | 80,64939631 | 0 | 0,099581 | 7130586  | 0,000001 | 0,135486 | 0,227311 | 0,533495 | 0,103708 | 0,362796 | 0,361362 | 1,285651 |
| SRR1974907 | fetal_quiescent | 2124248 | 1855627 | 1756839 | 1756839 | 1416880 | 80,64894896 | 0 | 0,068394 | 9800499  | 0        | 0,254083 | 0,322542 | 0,304661 | 0,117815 | 0,577526 | 0,573363 | 1,013129 |
| SRR1974908 | fetal_quiescent | 2026729 | 1804528 | 1708835 | 1708835 | 1252667 | 79,30526353 | 0 | 0,128211 | 4458014  | 0,000083 | 0,147741 | 0,233702 | 0,511095 | 0,08738  | 0,401442 | 0,399959 | 1,728357 |
| SRR1974909 | fetal_quiescent | 2105714 | 1851231 | 1754605 | 1754605 | 1476876 | 84,1714232  | 0 | 0,061889 | 11434025 | 0        | 0,228914 | 0,289695 | 0,283872 | 0,09752  | 0,518609 | 0,51663  | 0,843339 |
| SRR1974910 | fetal_quiescent | 1680639 | 1477816 | 1401042 | 1401042 | 1216272 | 86,81195853 | 0 | 0,041982 | 14077461 | 0        | 0,18651  | 0,29479  | 0,611629 | 0,107071 | 0,4813   | 0,477929 | 0,920967 |
| SRR1974911 | fetal_quiescent | 1947298 | 1714262 | 1628877 | 1628877 | 1460691 | 89,67427262 | 0 | 0,03315  | 21541860 | 0,000001 | 0,104006 | 0,147468 | 0,652582 | 0,095943 | 0,251475 | 0,250599 | 1,038702 |
| SRR1974912 | fetal_quiescent | 1707664 | 1539230 | 1462926 | 1462926 | 1255287 | 85,80659582 | 0 | 0,059138 | 10190535 | 0,000001 | 0,234094 | 0,292767 | 0,375932 | 0,531771 | 0,529866 | 0,531771 | 0,953171 |
| SRR1974913 | fetal_quiescent | 2333153 | 2092158 | 1987772 | 1987772 | 1736696 | 87,36897391 | 0 | 0,056541 | 14773247 | 0,000002 | 0,116774 | 0,153795 | 0,632588 | 0,096841 | 0,270569 | 0,269721 | 1,023342 |
| SRR1974915 | fetal_quiescent | 1402067 | 1213636 | 1144532 | 1144532 | 9146654 | 79,9160705  | 0 | 0,052734 | 8364784  | 0,000002 | 0,223365 | 0,337385 | 0,345763 | 0,093485 | 0,56075  | 0,558659 | 0,987969 |
| SRR1974916 | fetal_quiescent | 2077658 | 1816188 | 1723230 | 1723230 | 1549819 | 89,88457722 | 0 | 0,037418 | 20177697 | 0        | 0,131386 | 0,168275 | 0,613056 | 0,087284 | 0,299661 | 0,298729 | 0,904517 |
| SRR1974917 | fetal_quiescent | 1672990 | 1491111 | 1410788 | 1410788 | 1047123 | 73,83901763 | 0 | 0,059468 | 8407733  | 0,000001 | 0,065867 | 0,151979 | 0,600576 | 0,181578 | 0,217845 | 0,216944 | 2,31093  |
| SRR1974918 | fetal_quiescent | 2128267 | 1876398 | 1780745 | 1780745 | 1534646 | 86,1799977  | 0 | 0,05393  | 13711752 | 0,000001 | 0,170251 | 0,213695 | 0,519112 | 0,096941 | 0,383947 | 0,382492 | 0,986139 |
| SRR1974919 | fetal_quiescent | 1837619 | 1618036 | 1535813 | 1535813 | 1314129 | 85,56569061 | 0 | 0,06497  | 13261587 | 0,000003 | 0,166497 | 0,255773 | 0,466209 | 0,111518 | 0,42227  | 0,420864 | 0,980633 |
| SRR1974920 | fetal_quiescent | 2206970 | 1979680 | 1864102 | 1864102 | 1546124 | 82,94202785 | 0 | 0,131691 | 5342731  | 0,000003 | 0,144881 | 0,306225 | 0,43974  | 0,109151 | 0,451105 | 0,449882 | 1,058071 |
| SRR1974921 | fetal_quiescent | 2633138 | 2350196 | 2229784 | 2229784 | 1968830 | 88,29689333 | 0 | 0,080599 | 11548227 | 0        | 0,122416 | 0,182784 | 0,587622 | 0,107177 | 0,3052   | 0,304182 | 0,982502 |
| SRR1974922 | fetal_quiescent | 1666930 | 1456795 | 1381671 | 1381671 | 1195459 | 85,2269607  | 0 | 0,047333 | 12226389 | 0        | 0,133003 | 0,214991 | 0,543179 | 0,108827 | 0,347994 | 0,346834 | 1,012355 |
| SRR1974923 | fetal_quiescent | 1963600 | 1745042 | 1654915 | 1654915 | 1468196 | 88,7130572  | 0 | 0,052528 | 13481630 | 0        | 0,103251 | 0,178387 | 0,598961 | 0,119401 | 0,281638 | 0,280657 | 1,096624 |
| SRR1974924 | fetal_quiescent | 2264283 | 2008029 | 1908329 | 1908329 | 1719361 | 90,09772424 | 0 | 0,056037 | 14762635 | 0,000002 | 0,114451 | 0,203166 | 0,592502 | 0,089878 | 0,317617 | 0,316619 | 0,907113 |
| SRR1974925 | fetal_quiescent | 1845084 | 1649849 | 1567416 | 1567416 | 1384725 | 88,34444717 | 0 | 0,070533 | 9348915  | 0,000024 | 0,189771 | 0,31848  | 0,407596 | 0,084129 | 0,508251 | 0,506389 | 0,827152 |
| SRR1974926 | fetal_quiescent | 2341295 | 2082531 | 1975359 | 1975359 | 1810659 | 91,66227506 | 0 | 0,059304 | 14656240 | 0,000008 | 0,139378 | 0,227228 | 0,543822 | 0,089164 | 0,367005 | 0,365703 | 0,786871 |
| SRR1974927 | fetal_quiescent | 3101561 | 2786583 | 2645130 | 2645130 | 2306552 | 87,19994858 | 0 | 0,133228 | 10544156 | 0        | 0,133228 | 0,223175 | 0,546457 | 0,09714  | 0,356403 | 0,355233 | 1,089266 |
| SRR1974928 | fetal_quiescent | 1822318 | 1571131 | 1484576 | 1484576 | 1021481 | 68,80624502 | 0 | 0,064531 | 7570888  | 0        | 0,20008  | 0,264848 | 0,408135 | 0,126936 | 0,464929 | 0,462856 | 1,571258 |
| SRR1974929 | fetal_quiescent | 2622119 | 2358889 | 2246599 | 2246599 | 2012241 | 89,55812764 | 0 | 0,090121 | 10481548 | 0,000003 | 0,110792 | 0,199834 | 0,586413 | 0,130626 | 0,309685 | 0,309685 | 1,000193 |
| SRR1974930 | fetal_quiescent | 2265682 | 2026279 | 1925615 | 1925615 | 1727922 | 89,73351371 | 0 | 0,040537 | 20733813 | 0        | 0,119413 | 0,172114 | 0,610255 | 0,098218 | 0,291527 | 0,290604 | 0,905713 |
| SRR1974931 | fetal_quiescent | 2477964 | 2243947 | 2137334 | 2137334 | 1905794 | 89,16687799 | 0 | 0,07286  | 12435091 | 0        | 0,101386 | 0,163218 | 0,636428 | 0,098969 | 0,264603 | 0,263736 | 1,095827 |
| SRR1974932 | fetal_quiescent | 1843018 | 1654885 | 1564207 | 1564207 | 1254393 | 80,19354216 | 0 | 0,138385 | 4103702  | 0,000002 | 0,147888 | 0,297225 | 0,467352 | 0,087032 | 0,445613 | 0,44391  | 1,353582 |
| SRR1974933 | fetal_quiescent | 1997141 | 1767903 | 1676263 | 1676263 | 1359710 | 81,11555287 | 0 | 0,103127 | 6130909  | 0        | 0,156668 | 0,279238 | 0,459389 | 0,104649 | 0,435918 | 0,434489 | 1,246637 |
| SRR1974934 | fetal_quiescent | 1009804 | 874124  | 824506  | 824506  | 680960  | 82,59005999 | 0 | 0,033326 | 9988230  | 0        | 0,088876 | 0,14234  | 0,654218 | 0,114567 | 0,231215 | 0,230428 | 1,695292 |
| SRR1974935 | fetal_quiescent | 2241490 | 1980374 | 1878660 | 1878660 | 1674595 | 89,13737647 | 0 | 0,044396 | 18297402 | 0,000001 | 0,125818 | 0,182333 | 0,595334 | 0,308151 | 0,307002 | 0,307002 | 0,956437 |
| SRR1974936 | fetal_quiescent | 1947320 | 1728422 | 1626760 | 1626760 | 1409505 | 86,64492611 | 0 | 0,052226 | 12286841 | 0,000002 | 0,126295 | 0,200078 | 0,575681 | 0,097943 | 0,263744 | 0,262542 | 0,948744 |
| SRR1974937 | fetal_quiescent | 2358703 | 2084164 | 1977870 | 1977870 | 1748388 | 88,39751854 | 0 | 0,040494 | 19238615 | 0,000014 | 0,121823 | 0,168835 | 0,61113  | 0,098027 | 0,290659 | 0,28963  | 1,03089  |
| SRR1974938 | fetal_quiescent | 1812973 | 1632259 | 1544875 | 1544875 | 1211032 | 78,39029048 | 0 | 0,137086 | 4003396  | 0        | 0,190071 | 0,364918 | 0,337972 | 0,107039 | 0,554989 | 0,552911 | 1,239729 |
| SRR1974939 | fetal_quiescent | 1741301 | 1586947 | 1510618 | 1510618 | 1319115 | 87,32287051 | 0 | 0,040182 | 15971438 | 0,000003 | 0,089026 | 0,142855 | 0,633705 | 0,134411 | 0,231181 | 0,231181 | 1,335333 |
| SRR1974940 | fetal_quiescent | 2025248 | 1793263 | 1704404 | 1704404 | 1517360 | 89,02584129 | 0 | 0,038646 | 19123738 | 0,000001 | 0,124308 | 0,163694 | 0,615892 | 0,086005 | 0,287809 | 0,287809 | 0,993487 |
| SRR1974941 | fetal_quiescent | 2136650 | 1933448 | 1814878 | 1814878 | 1589048 | 87,1042836  | 0 | 0,143262 | 4977070  | 0,000001 | 0,136365 | 0,277535 | 0,494754 | 0,091346 | 0,4139   | 0,412492 | 1,06645  |
| SRR1974942 | fetal_quiescent | 2558291 | 2318689 | 2213244 | 2213244 | 1991079 | 89,56283284 | 0 | 0,056778 | 16863179 | 0        | 0,109173 | 0,165056 | 0,626548 | 0,099222 | 0,273729 | 0,273729 | 0,975105 |
| SRR1974943 | fetal_quiescent | 1389648 | 1232890 | 1165663 | 1165663 | 895651  | 77,08583012 | 0 | 0,074003 | 6078419  | 0,000003 | 0,17375  | 0,262249 | 0,441176 | 0        |          |          |          |

|           |       |             |         |         |         |         |             |              |          |           |          |          |          |          |          |          |          |
|-----------|-------|-------------|---------|---------|---------|---------|-------------|--------------|----------|-----------|----------|----------|----------|----------|----------|----------|----------|
| SR197470  | fetal | quiescent   | 2086716 | 1853093 | 1762079 | 1420302 | 80,60376408 | 0            | 0,085927 | 7783993   | 0        | 0,186482 | 0,29662  | 0,406603 | 0,483101 | 0,481189 | 1,193353 |
| SR197471  | fetal | quiescent   | 1752345 | 1559127 | 1482748 | 1482748 | 1160761     | 78,2844213   | 0        | 0,088818  | 0,182028 | 0,507993 | 0,298462 | 0,193545 | 0,298462 | 0,297292 | 1,675564 |
| SR197472  | fetal | quiescent   | 1916912 | 1702363 | 1612862 | 1612862 | 1330946     | 82,52076123  | 0        | 0,060693  | 10516302 | 0        | 0,139041 | 0,213119 | 0,508556 | 0,35216  | 1,241444 |
| SR197473  | fetal | quiescent   | 1839044 | 1642472 | 1557217 | 1557217 | 1243465     | 79,85174834  | 0        | 0,060616  | 9838070  | 0        | 0,086442 | 0,119237 | 0,662681 | 0,205679 | 1,600384 |
| SR197474  | fetal | quiescent   | 2364699 | 2122784 | 2017287 | 2017287 | 1486076     | 73,66705878  | 0        | 0,144203  | 4644458  | 0        | 0,108413 | 0,225399 | 0,575275 | 0,333812 | 1,606735 |
| SR197475  | fetal | quiescent   | 1366754 | 1192814 | 1131654 | 1131654 | 880595      | 77,81486214  | 0,000001 | 0,049197  | 8653602  | 0,000001 | 0,138209 | 0,222602 | 0,47065  | 0,360812 | 1,355928 |
| SR197476  | fetal | quiescent   | 1492757 | 1336689 | 1263436 | 1263436 | 887276      | 69,86788409  | 0        | 0,113987  | 3571903  | 0        | 0,104926 | 0,225469 | 0,558058 | 0,330395 | 1,794819 |
| SR197477  | fetal | quiescent   | 1855213 | 1635196 | 1552242 | 1552242 | 1383020     | 89,04085777  | 0        | 0,052053  | 12819670 | 0        | 0,097214 | 0,161276 | 0,640758 | 0,25849  | 1,105795 |
| SR197478  | fetal | quiescent   | 1746381 | 1547938 | 1468971 | 1468971 | 1253156     | 85,30842338  | 0        | 0,078036  | 7605978  | 0        | 0,210399 | 0,330917 | 0,360222 | 0,098462 | 0,539171 |
| SR197479  | fetal | quiescent   | 2163371 | 1913589 | 1819620 | 1819620 | 1266175     | 69,58458359  | 0        | 0,139917  | 4092009  | 0        | 0,22827  | 0,395506 | 0,626815 | 0,107609 | 1,267185 |
| SR197480  | fetal | quiescent   | 957772  | 85063   | 821926  | 821926  | 715009      | 86,99189465  | 0        | 0,046243  | 7490814  | 0,000001 | 0,103959 | 0,19075  | 0,599277 | 0,106612 | 1,232879 |
| SR197481  | fetal | quiescent   | 2412694 | 2267744 | 2127565 | 2127565 | 1892124     | 88,93378111  | 0        | 0,05415   | 16834482 | 0,000004 | 0,142655 | 0,196238 | 0,5662   | 0,094902 | 0,338893 |
| SR197482  | fetal | quiescent   | 1613127 | 1499816 | 1405423 | 1405423 | 1238681     | 88,13581392  | 0        | 0,076401  | 7688022  | 0,000001 | 0,167658 | 0,28194  | 0,437999 | 0,112402 | 0,445998 |
| SR197483  | fetal | quiescent   | 1656961 | 1509694 | 1405614 | 1405614 | 1185083     | 84,31069981  | 0        | 0,082728  | 6761764  | 0        | 0,114041 | 0,191521 | 0,570949 | 0,12349  | 1,772615 |
| SR197484  | fetal | quiescent   | 1718082 | 1597979 | 1490651 | 1490651 | 1226257     | 82,26318568  | 0        | 0,091037  | 6319647  | 0,000002 | 0,176132 | 0,263201 | 0,468297 | 0,092369 | 0,439333 |
| SR197485  | fetal | quiescent   | 1436390 | 1363423 | 1279273 | 1279273 | 1139943     | 89,10865781  | 0        | 0,059857  | 11938261 | 0,000028 | 0,16479  | 0,252139 | 0,470973 | 0,112077 | 0,413976 |
| SR197486  | fetal | quiescent   | 1183796 | 1051040 | 1006446 | 1006446 | 749503      | 84,40611816  | 0        | 0,057892  | 7051622  | 0        | 0,235296 | 0,186361 | 0,485382 | 0,093281 | 1,092591 |
| SR197487  | fetal | quiescent   | 1574514 | 1469135 | 1374902 | 1374902 | 1085006     | 78,81515177  | 0,000001 | 0,094813  | 5354140  | 0        | 0,1805   | 0,270508 | 0,44295  | 0,106642 | 0,451007 |
| SR197488  | fetal | quiescent   | 1302901 | 1241432 | 1164744 | 1164744 | 1011414     | 86,83573386  | 0        | 0,063418  | 7633341  | 0        | 0,226962 | 0,249072 | 0,412947 | 0,111019 | 1,152569 |
| SR197489  | fetal | quiescent   | 1558646 | 1477958 | 1383534 | 1383534 | 1249098     | 90,0994984   | 0,000009 | 0,055588  | 10814955 | 0,000009 | 0,145577 | 0,225377 | 0,52882  | 0,100217 | 0,370954 |
| SR197491  | fetal | quiescent   | 1811917 | 1712982 | 1610258 | 1610258 | 1408536     | 87,47269071  | 0        | 0,067407  | 9973030  | 0        | 0,15994  | 0,246719 | 0,505607 | 0,406649 | 1,249721 |
| SR197492  | fetal | quiescent   | 1654538 | 1561585 | 1465963 | 1465963 | 1281699     | 87,43051496  | 0        | 0,061382  | 10008628 | 0        | 0,116633 | 0,181682 | 0,632832 | 0,068854 | 0,296181 |
| SR197493  | fetal | quiescent   | 1824216 | 1672467 | 1569328 | 1569328 | 1325333     | 84,45226237  | 0        | 0,085937  | 7262669  | 0        | 0,21615  | 0,269444 | 0,485937 | 0,09117  | 0,485594 |
| SR197494  | fetal | quiescent   | 1747686 | 1658960 | 1563386 | 1563386 | 1391260     | 88,99017901  | 0        | 0,066489  | 9939190  | 0        | 0,2117   | 0,29862  | 0,376227 | 0,113453 | 0,506232 |
| SR197495  | fetal | quiescent   | 1750524 | 1653131 | 1552331 | 1552331 | 1353262     | 87,17612416  | 0        | 0,086008  | 7401859  | 0        | 0,134055 | 0,231933 | 0,519072 | 0,11494  | 0,365988 |
| SR197496  | fetal | quiescent   | 1954519 | 1814233 | 1696976 | 1696976 | 1489421     | 87,76912579  | 0,000001 | 0,061004  | 11705827 | 0,000001 | 0,113006 | 0,170274 | 0,606894 | 0,109824 | 0,28328  |
| SR197498  | fetal | quiescent   | 1880853 | 1785414 | 1682065 | 1682065 | 1491510     | 88,67136526  | 0        | 0,057762  | 12408654 | 0        | 0,106444 | 0,175745 | 0,613048 | 0,104763 | 0,282189 |
| SR197499  | fetal | quiescent   | 2054215 | 1949592 | 1863313 | 1863313 | 1636474     | 89,01935563  | 0,000005 | 0,074043  | 11057864 | 0,000005 | 0,100463 | 0,145408 | 0,673178 | 0,080946 | 0,245871 |
| SR197500  | fetal | quiescent   | 1720115 | 1618470 | 1515606 | 1515606 | 1348581     | 88,97965566  | 0        | 0,06084   | 10628686 | 0        | 0,126552 | 0,206465 | 0,570208 | 0,096775 | 0,33017  |
| SR197501  | fetal | quiescent   | 1313460 | 1209015 | 1131419 | 1131419 | 878394      | 77,63649011  | 0        | 0,095799  | 4286854  | 0        | 0,196968 | 0,296599 | 0,377271 | 0,129162 | 0,493566 |
| SR197502  | fetal | quiescent   | 1766481 | 1668008 | 1575212 | 1575212 | 1363204     | 86,54098623  | 0        | 0,074406  | 8700357  | 0        | 0,114745 | 0,154864 | 0,610824 | 0,269609 | 0,762719 |
| SR197503  | fetal | quiescent   | 1341504 | 1268295 | 1196251 | 1196251 | 1023376     | 85,54860142  | 0        | 0,080841  | 5983609  | 0        | 0,145087 | 0,231611 | 0,510523 | 0,112779 | 0,376998 |
| SR197504  | fetal | quiescent   | 1349065 | 1279378 | 1207744 | 1207744 | 1055675     | 87,4088383   | 0        | 0,066538  | 7576877  | 0        | 0,200631 | 0,299741 | 0,402034 | 0,097594 | 0,496757 |
| SR197505  | fetal | quiescent   | 1769628 | 1604423 | 1503837 | 1503837 | 1279893     | 85,10862547  | 0,000006 | 0,0702    | 8684305  | 0,000006 | 0,147287 | 0,231718 | 0,524511 | 0,096478 | 0,379005 |
| SR197506  | fetal | quiescent   | 1667634 | 1562679 | 1464404 | 1464404 | 1133592     | 77,40978582  | 0        | 0,119866  | 4342647  | 0        | 0,145028 | 0,249314 | 0,462129 | 0,143528 | 0,394342 |
| SR197507  | fetal | quiescent   | 2200461 | 2101091 | 1991849 | 1991849 | 1773147     | 89,02015163  | 0        | 0,069495  | 12125194 | 0        | 0,169422 | 0,20344  | 0,537416 | 0,089723 | 0,370185 |
| SR197508  | fetal | quiescent   | 1662284 | 1578809 | 1486232 | 1486232 | 1275157     | 85,7979777   | 0,000001 | 0,082471  | 7299809  | 0,000001 | 0,133612 | 0,19894  | 0,572933 | 0,094514 | 0,332553 |
| SR1974875 | fetal | replicating | 2681531 | 2310602 | 2165526 | 2165526 | 1953500     | 90,20903005  | 0        | 0,076853  | 12049488 | 0        | 0,16253  | 0,210439 | 0,544983 | 0,082048 | 0,372969 |
| SR1974876 | fetal | replicating | 2028142 | 1730782 | 1614984 | 1614984 | 1330135     | 82,36211628  | 0,000001 | 0,109807  | 5604694  | 0,000001 | 0,245627 | 0,386428 | 0,271964 | 0,095981 | 0,632053 |
| SR1974877 | fetal | replicating | 2679417 | 2290410 | 2128466 | 2128466 | 1656240     | 77,81378702  | 0,000001 | 0,077885  | 5622758  | 0,000001 | 0,077885 | 0,14243  | 0,691872 | 0,087812 | 0,220315 |
| SR1974878 | fetal | replicating | 2105364 | 1784281 | 1665678 | 1665678 | 1457820     | 87,52111753  | 0,058859 | 0,1189314 | 1189314  | 0        | 0,187734 | 0,225401 | 0,511983 | 0,074882 | 0,413135 |
| SR1974879 | fetal | replicating | 3172954 | 2760855 | 2572313 | 2572313 | 2169027     | 84,3220479   | 0        | 0,157037  | 6162406  | 0        | 0,112525 | 0,244609 | 0,559266 | 0,0836   | 0,357134 |
| SR1974880 | fetal | replicating | 2972100 | 2604611 | 2428467 | 2428467 | 2068355     | 85,17122119  | 0        | 0,171203  | 5329487  | 0        | 0,094885 | 0,172842 | 0,666867 | 0,065406 | 0,267727 |
| SR1974881 | fetal | replicating | 2169683 | 1874361 | 1749428 | 1749428 | 1483066     | 84,7433767   | 0,000005 | 0,125597  | 5398625  | 0,000005 | 0,118758 | 0,216369 | 0,560769 | 0,104099 | 0,335128 |
| SR1974882 | fetal | replicating | 1836518 | 1615864 | 1507021 | 1507021 | 1340544     | 88,95323954  | 0,000003 | 0,054854  | 1176811  | 0,000003 | 0,130261 | 0,191346 | 0,561118 | 0,117272 | 0,321607 |
| SR1974883 | fetal | replicating | 2385711 | 2072462 | 1936106 | 1936106 | 1708377     | 86,23778244  | 0,000001 | 0,084186  | 9568644  | 0,000001 | 0,117773 | 0,205242 | 0,556412 | 0,120573 | 0,323015 |
| SR1974884 | fetal | replicating | 3386354 | 2961395 | 2784213 | 2784213 | 2006709     | 72,0745033   | 0        | 0,21583   | 3952609  | 0        | 0,160927 | 0,365962 | 0,383515 | 0,089596 | 0,526889 |
| SR1974885 | fetal | replicating | 2598586 | 2265861 | 2126996 | 2126996 | 1895530     | 89,11770403  | 0        | 0,103945  | 8474498  | 0        | 0,140119 | 0,245411 | 0,511664 | 0,102806 | 0,385553 |
| SR1974886 | fetal | replicating | 2493769 | 2137415 | 1986472 | 1986472 | 1708358     | 86,02477155  | 0,000001 | 0,097182  | 8212652  | 0,000001 | 0,14582  | 0,2385   | 0,513282 | 0,102397 | 0,384312 |
| SR1974887 | fetal | replicating | 3575583 | 3154429 | 2940657 | 2940657 | 2613148     | 88,86272693  | 0,000031 | 0,162685  | 7134323  | 0,000031 | 0,283355 | 0,399501 | 0,674007 | 0,240706 | 0,68205  |
| SR1974888 | fetal | replicating | 2799367 | 2413112 | 2257851 | 2257851 | 1867995     | 82,73331588  | 0        | 0,126241  | 6761783  | 0        | 0,117131 | 0,21194  | 0,577167 | 0,093761 | 0,328071 |
| SR1974889 | fetal | replicating | 2654964 | 2265276 | 2119276 | 2119276 | 1417943     | 66,969695313 | 0        | 0,139894  | 4583336  | 0        | 0,135413 | 0,211971 | 0,578293 | 0,074323 | 0,347384 |
| SR1974890 | fetal | replicating | 2636438 | 2279903 | 2118938 | 2118938 | 1866873     | 88,10418238  | 0        | 0,099242  | 8772452  | 0        | 0,162395 | 0,244882 | 0,501594 | 0,091129 | 0,407277 |
| SR1974891 | fetal | replicating | 2667165 | 2318520 | 2159456 | 2159456 | 1901405     | 88,5018486   | 0        | 0,130167  | 6655121  | 0        | 0,103191 | 0,186606 | 0,634881 | 0,073722 | 0,289797 |
| SR1974892 | fetal | replicating | 1719377 | 1466482 | 1356970 | 1356970 | 1201153     | 88,51728483  | 0,000001 | 0,049607  | 11702821 | 0,000001 | 0,158837 | 0,233296 | 0,503385 | 0,104882 | 0,392133 |
| SR1974894 | fetal | replicating | 1870820 | 1611558 | 1495271 | 1495271 | 1314056     | 87,88079218  | 0        | 0,074622  | 8361008  | 0        | 0,126151 | 0,22254  | 0,568213 | 0,083095 | 0,348691 |
| SR1974896 | fetal | replicating | 2445809 | 2123821 | 1977682 | 1977682 | 1614127     | 81,61711539  | 0        | 0,179334  | 3944460  | 0        | 0,21469  | 0,388244 | 0,331155 | 0,065912 | 0,602933 |
| SR1974900 | fetal | replicating | 2698557 | 2327646 | 2167126 | 2167126 | 1841750     | 84,98582916  | 0,000001 | 0,113138  | 6468747  | 0,000001 | 0,113138 | 0,193313 | 0,614616 | 0,0789   |          |

|            |           |         |         |         |         |         |             |          |            |          |          |          |          |          |          |          |           |          |
|------------|-----------|---------|---------|---------|---------|---------|-------------|----------|------------|----------|----------|----------|----------|----------|----------|----------|-----------|----------|
| SRR1974584 | hybrid    | 2291202 | 2212321 | 2084261 | 2084261 | 1881159 | 90,25544306 | 0        | 0,128927   | 6653876  | 0        | 0,17397  | 0,20418  | 0,483369 | 0,138481 | 0,37815  | 0,375813  | 1,086566 |
| SRR1974601 | hybrid    | 2459644 | 2315885 | 2122929 | 2122929 | 1746115 | 82,2502778  | 0,000001 | 0,0986     | 8262393  | 0,000001 | 0,081851 | 0,133321 | 0,619383 | 0,165445 | 0,215172 | 0,212995  | 1,546566 |
| SRR1974608 | hybrid    | 3194361 | 3017306 | 2819228 | 2819228 | 2476932 | 87,85582013 | 0,000002 | 0,065676   | 14436635 | 0,000002 | 0,065676 | 0,120588 | 0,674898 | 0,138836 | 0,186264 | 0,184549  | 1,160069 |
| SRR1974619 | hybrid    | 2653791 | 2507500 | 2304582 | 2304582 | 1930889 | 83,77610343 | 0,094197 | 0,959386   | 959386   | 0,094197 | 0,109129 | 0,152851 | 0,958209 | 0,139811 | 0,26198  | 0,259462  | 1,374865 |
| SRR1974680 | hybrid    | 4000103 | 3718709 | 357025  | 357025  | 2522396 | 70,91308045 | 0,000015 | 0,100825   | 11662344 | 0,000015 | 0,198359 | 0,252079 | 0,415081 | 0,134466 | 0,450348 | 0,444991  | 0,850234 |
| SRR1974683 | hybrid    | 6527969 | 6115482 | 5882396 | 5882396 | 4335068 | 73,69561655 | 0,000009 | 0,105572   | 19070752 | 0,000009 | 0,151928 | 0,173414 | 0,554115 | 0,325342 | 0,321296 | 0,778325  | 1,086566 |
| SRR1974685 | hybrid    | 7618948 | 7179004 | 6952227 | 6952227 | 5064634 | 73,02766009 | 0,107287 | 0,21894621 | 21894621 | 0,107287 | 0,126859 | 0,142563 | 0,594216 | 0,136362 | 0,269422 | 0,266346  | 0,8353   |
| SRR1974687 | hybrid    | 5781970 | 5421782 | 5217381 | 5217381 | 3964071 | 75,97817756 | 0,109971 | 0,16681168 | 16681168 | 0,109971 | 0,134362 | 0,185143 | 0,546884 | 0,133602 | 0,319505 | 0,315926  | 0,740417 |
| SRR1974691 | hybrid    | 8122463 | 7659787 | 7398401 | 7398401 | 5391788 | 72,8777475  | 0,123406 | 0,20017804 | 20017804 | 0,123406 | 0,172427 | 0,204947 | 0,49584  | 0,126786 | 0,373734 | 0,373145  | 0,753785 |
| SRR1974694 | hybrid    | 3375367 | 3169726 | 3050337 | 3050337 | 2229870 | 73,10241459 | 0,085212 | 0,146977   | 12336718 | 0,085212 | 0,146977 | 0,184992 | 0,550946 | 0,117086 | 0,331968 | 0,327866  | 0,834169 |
| SRR1974695 | hybrid    | 4480658 | 4232368 | 4010590 | 4010590 | 2249527 | 56,08967758 | 0,112194 | 0,926525   | 926525   | 0,112194 | 0,058312 | 0,077311 | 0,641794 | 0,222582 | 0,135623 | 0,133746  | 2,092951 |
| SRR1974696 | hybrid    | 5326782 | 5047883 | 4838151 | 4838151 | 3089976 | 63,86687807 | 0,152563 | 0,9073124  | 9073124  | 0,152563 | 0,106577 | 0,144795 | 0,569838 | 0,178791 | 0,251372 | 0,248089  | 1,668272 |
| SRR1974700 | hybrid    | 6095305 | 5734243 | 5508806 | 5508806 | 4044747 | 73,42329717 | 0,109672 | 17072040   | 17072040 | 0,109672 | 0,174331 | 0,225119 | 0,483252 | 0,120898 | 0,39585  | 0,391036  | 0,732324 |
| SRR1974702 | hybrid    | 5373115 | 5041602 | 4862266 | 4862266 | 2802311 | 57,62808945 | 0,174789 | 7054160    | 7054160  | 0,174789 | 0,42361  | 0,416503 | 0,675551 | 0,092337 | 0,840113 | 0,829167  | 0,941944 |
| SRR1974708 | hybrid    | 6779970 | 6305840 | 6024455 | 6024455 | 350450  | 58,17040712 | 0,155577 | 10067068   | 10067068 | 0,155577 | 0,052991 | 0,083006 | 0,638662 | 0,225341 | 0,135997 | 0,134233  | 2,354686 |
| SRR1974716 | hybrid    | 6067086 | 5687917 | 5437666 | 5437666 | 3507704 | 64,50752952 | 0,000002 | 0,142699   | 11097836 | 0,000002 | 0,088789 | 0,153145 | 0,587804 | 0,170261 | 0,241933 | 0,246752  | 1,664752 |
| SRR1974719 | hybrid    | 5778651 | 5472499 | 5278184 | 5278184 | 3601339 | 68,6206695  | 0,117326 | 14130651   | 14130651 | 0,117326 | 0,16994  | 0,159912 | 0,546263 | 0,123883 | 0,329852 | 0,326006  | 1,055938 |
| SRR1974729 | hybrid    | 6748865 | 6348745 | 6125332 | 6125332 | 4587161 | 74,92396362 | 0,106969 | 19893808   | 19893808 | 0,106969 | 0,177335 | 0,217981 | 0,505368 | 0,103716 | 0,390916 | 0,386366  | 0,693978 |
| SRR1974742 | hybrid    | 6495005 | 6161829 | 5969738 | 5969738 | 4174066 | 69,3042197  | 0,127484 | 14955377   | 14955377 | 0,127484 | 0,244649 | 0,212214 | 0,428136 | 0,114993 | 0,458863 | 0,451329  | 0,653372 |
| SRR1974746 | hybrid    | 8620937 | 8088555 | 7775642 | 7775642 | 5593306 | 71,93368728 | 0,122586 | 20915169   | 20915169 | 0,122586 | 0,200126 | 0,232004 | 0,460081 | 0,107789 | 0,432129 | 0,426941  | 0,708837 |
| SRR1974747 | hybrid    | 7435686 | 7023210 | 6774821 | 6774821 | 4974565 | 73,42725365 | 0,111443 | 2063460    | 2063460  | 0,111443 | 0,150341 | 0,176525 | 0,539493 | 0,132677 | 0,323217 | 0,323217  | 0,79211  |
| SRR1974748 | hybrid    | 6376249 | 6003243 | 5784772 | 5784772 | 4106211 | 70,98321248 | 0,113643 | 16679527   | 16679527 | 0,113643 | 0,125408 | 0,137014 | 0,608053 | 0,129525 | 0,262422 | 0,259367  | 1,041843 |
| SRR1974749 | hybrid    | 6984531 | 6589958 | 6298086 | 6298086 | 4429977 | 70,33878229 | 0,133188 | 15126244   | 15126244 | 0,133188 | 0,09628  | 0,105272 | 0,664066 | 0,134383 | 0,201552 | 0,199181  | 1,20548  |
| SRR1974804 | hybrid    | 3811218 | 3676657 | 3437125 | 3437125 | 2966224 | 86,29956723 | 0,097893 | 14144592   | 14144592 | 0,097893 | 0,101822 | 0,175304 | 0,630045 | 0,092803 | 0,277125 | 0,275239  | 0,99331  |
| SRR1974816 | hybrid    | 487376  | 456414  | 427859  | 427859  | 332920  | 77,89715771 | 0,032104 | 5079056    | 5079056  | 0,032104 | 0,259316 | 0,19142  | 0,427218 | 0,122045 | 0,450736 | 0,445699  | 1,254775 |
| SRR1974826 | hybrid    | 253920  | 2453355 | 2294121 | 2294121 | 1795222 | 78,2531523  | 0,123935 | 6662673    | 6662673  | 0,123935 | 0,073703 | 0,179189 | 0,638301 | 0,108806 | 0,252891 | 0,250929  | 1,365689 |
| SRR1974833 | hybrid    | 2508730 | 2385787 | 2243431 | 2243431 | 1879132 | 83,7615242  | 0,063502 | 14126563   | 14126563 | 0,063502 | 0,185914 | 0,245039 | 0,483692 | 0,085354 | 0,430952 | 0,427348  | 0,836947 |
| SRR1974837 | hybrid    | 3590155 | 3249084 | 3171418 | 3171418 | 2736857 | 86,29758045 | 0,098128 | 13017315   | 13017315 | 0,098128 | 0,093051 | 0,203171 | 0,591347 | 0,112341 | 0,296222 | 0,293927  | 0,960499 |
| SRR1974850 | hybrid    | 3402184 | 3231374 | 3006750 | 3006750 | 2544535 | 84,62742163 | 0,074895 | 16128622   | 16128622 | 0,074895 | 0,085953 | 0,148365 | 0,66288  | 0,102796 | 0,234319 | 0,232552  | 1,219496 |
| SRR1974855 | hybrid    | 2918196 | 2813247 | 2627146 | 2627146 | 2150126 | 81,84265359 | 0,101931 | 9817348    | 9817348  | 0,101931 | 0,156868 | 0,254711 | 0,467144 | 0,121269 | 0,411579 | 0,408683  | 1,032159 |
| SRR1974852 | microglia | 2281856 | 2162965 | 2001564 | 2001564 | 1061629 | 87,72469929 | 0,106169 | 7672905    | 7672905  | 0,106169 | 0,065324 | 0,115325 | 0,660378 | 0,180649 | 0,179283 | 0,1761423 | 1,725335 |
| SRR1974590 | microglia | 3273255 | 3140053 | 2928717 | 2928717 | 2386697 | 81,49291994 | 0,226199 | 4445829    | 4445829  | 0,226199 | 0,112467 | 0,274701 | 0,523799 | 0,089034 | 0,387168 | 0,384674  | 1,763276 |
| SRR1974591 | microglia | 1934969 | 1833564 | 1717992 | 1717992 | 1439961 | 83,8165137  | 0,121889 | 5416439    | 5416439  | 0,121889 | 0,114695 | 0,18712  | 0,555444 | 0,142741 | 0,299502 | 0,299502  | 1,876523 |
| SRR1974595 | microglia | 2402201 | 2274122 | 2182808 | 2182808 | 1878986 | 88,70214823 | 0,113897 | 7609239    | 7609239  | 0,113897 | 0,119959 | 0,242086 | 0,545084 | 0,092869 | 0,362045 | 0,359333  | 1,458646 |
| SRR1974597 | microglia | 2695644 | 2592454 | 2398469 | 2398469 | 2126469 | 88,65943233 | 0,204862 | 4453916    | 4453916  | 0,204862 | 0,065207 | 0,14705  | 0,686753 | 0,120889 | 0,212256 | 0,210889  | 1,939209 |
| SRR1974598 | microglia | 2068392 | 1944906 | 1801814 | 1801814 | 1539580 | 85,44611153 | 0,135561 | 1552840    | 1552840  | 0,135561 | 0,149798 | 0,277167 | 0,463108 | 0,109886 | 0,426965 | 0,423691  | 1,610874 |
| SRR1974599 | microglia | 1870663 | 1771047 | 1661224 | 1661224 | 1378692 | 82,99254044 | 0,000001 | 4146968    | 4146968  | 0,000001 | 0,203092 | 0,304433 | 0,392571 | 0,099904 | 0,507525 | 0,503708  | 1,685011 |
| SRR1974606 | microglia | 3147676 | 2985096 | 2841064 | 2841064 | 2194602 | 77,24577834 | 0,000001 | 7971388    | 7971388  | 0,000001 | 0,171607 | 0,142378 | 0,578873 | 0,107132 | 0,313985 | 0,310579  | 1,45133  |
| SRR1974666 | microglia | 2232870 | 1874450 | 1744457 | 1744457 | 1349355 | 77,35100378 | 0,080722 | 7901897    | 7901897  | 0,080722 | 0,114468 | 0,158228 | 0,630528 | 0,096776 | 0,271482 | 0,271482  | 1,725335 |
| SRR1974668 | microglia | 1694632 | 1409310 | 1303162 | 1303162 | 983270  | 75,45262983 | 0,084666 | 5474122    | 5474122  | 0,084666 | 0,118614 | 0,192185 | 0,58286  | 0,106341 | 0,310799 | 0,309215  | 1,776182 |
| SRR1974669 | microglia | 1076977 | 932045  | 860433  | 860433  | 655928  | 76,23231559 | 0,042099 | 7570067    | 7570067  | 0,042099 | 0,114537 | 0,172964 | 0,53857  | 0,137345 | 0,287501 | 0,285982  | 1,867033 |
| SRR1974671 | microglia | 2243147 | 1922741 | 1788595 | 1788595 | 1258260 | 70,34907288 | 0,129666 | 4422274    | 4422274  | 0,129666 | 0,1349   | 0,201078 | 0,488467 | 0,175446 | 0,335979 | 0,334174  | 2,018131 |
| SRR1974788 | microglia | 1700052 | 1562932 | 1476602 | 1476602 | 808371  | 54,74535454 | 0,077478 | 494366     | 494366   | 0,077478 | 0,200121 | 0,192129 | 0,499733 | 0,180007 | 0,392251 | 0,388651  | 1,831102 |
| SRR1974860 | microglia | 1492728 | 1221535 | 1121279 | 1121279 | 681698  | 70,9646546  | 0,08605  | 7370414    | 7370414  | 0,08605  | 0,29316  | 0,262293 | 0,340452 | 0,104094 | 0,555453 | 0,55274   | 1,734899 |
| SRR1974861 | microglia | 2030215 | 1669276 | 1535797 | 1535797 | 745807  | 48,5615612  | 0,119371 | 2870003    | 2870003  | 0,119371 | 0,330025 | 0,296914 | 0,248162 | 0,124899 | 0,626939 | 0,622827  | 1,759477 |
| SRR1974868 | microglia | 2979547 | 2553854 | 2367335 | 2367335 | 1918215 | 80,80035145 | 0,108337 | 8178227    | 8178227  | 0,108337 | 0,116869 | 0,17452  | 0,607814 | 0,100797 | 0,291389 | 0,289998  | 1,467072 |
| SRR1974602 | neurons   | 2940987 | 2791936 | 2616933 | 2616933 | 2289470 | 87,48676409 | 0,080557 | 13434644   | 13434644 | 0,080557 | 0,187465 | 0,238624 | 0,443529 | 0,130176 | 0,426289 | 0,422115  | 0,647441 |
| SRR1974603 | neurons   | 2243421 | 2116527 | 1985709 | 1985709 | 1557857 | 78,45343905 | 0,100061 | 7256131    | 7256131  | 0,100061 | 0,140447 | 0,19247  | 0,448606 | 0,218477 | 0,332916 | 0,329607  | 1,375681 |
| SRR1974605 | neurons   | 3344038 | 3174498 | 2975040 | 2975040 | 2578482 | 86,67049855 | 0,086314 | 14064489   | 14064489 | 0,086314 | 0,074156 | 0,11129  | 0,645663 | 0,159992 | 0,185446 | 0,183698  | 1,148374 |
| SRR1974607 | neurons   | 3998626 | 3773857 | 3511947 | 3511947 | 2992006 | 85,1950784  | 0,106554 | 13023735   | 13023735 | 0,106554 | 0,116886 | 0,195002 | 0,539542 | 0,148769 | 0,311688 | 0,308858  | 1,109974 |
| SRR1974609 | neurons   | 3292550 | 3138761 | 2926320 | 2926320 | 2591101 | 88,3323674  | 0,000007 | 14854573   | 14854573 | 0,000007 | 0,068363 | 0,105135 | 0,67554  | 0,150955 | 0,173497 | 0,171973  | 0,889892 |
| SRR        |           |         |         |         |         |         |             |          |            |          |          |          |          |          |          |          |           |          |

|            |         |         |         |         |         |         |             |          |           |          |          |          |          |          |          |          |           |          |
|------------|---------|---------|---------|---------|---------|---------|-------------|----------|-----------|----------|----------|----------|----------|----------|----------|----------|-----------|----------|
| SRR1974642 | neurons | 4011048 | 3770781 | 3488840 | 3488840 | 2983150 | 85,50549753 | 0        | 0,101991  | 13612274 | 0        | 0,042715 | 0,070403 | 0,717714 | 0,169168 | 0,113117 | 0,111929  | 1,708577 |
| SRR1974643 | neurons | 6053839 | 5704158 | 5321095 | 5321095 | 4609925 | 86,6348976  | 0        | 0,108191  | 19738424 | 0,000003 | 0,130771 | 0,210898 | 0,500534 | 0,157794 | 0,341669 | 0,337883  | 0,796001 |
| SRR1974645 | neurons | 4278882 | 4026765 | 3769378 | 3769378 | 3236234 | 85,85830341 | 0        | 0,084493  | 18056721 | 0,000006 | 0,099013 | 0,103448 | 0,682845 | 0,123569 | 0,193581 | 0,19156   | 0,854116 |
| SRR1974646 | neurons | 4962965 | 4648648 | 4189246 | 4189246 | 3222914 | 76,93303282 | 0        | 0,284853  | 4522230  | 0,000001 | 0,124136 | 0,16264  | 0,380841 | 0,286776 | 0,283568 | 0,1792061 | 1,549486 |
| SRR1974648 | neurons | 2413906 | 2310995 | 2158400 | 2158400 | 1825316 | 84,56801334 | 0        | 0,082793  | 10406172 | 0,000003 | 0,028701 | 0,041083 | 0,528207 | 0,402006 | 0,069783 | 0,069168  | 1,549486 |
| SRR1974649 | neurons | 4626194 | 4413800 | 4168922 | 4168922 | 3602844 | 86,42147778 | 0        | 0,112163  | 14835991 | 0,000002 | 0,195628 | 0,177554 | 0,486554 | 0,140062 | 0,373382 | 0,369364  | 0,72064  |
| SRR1974650 | neurons | 3092532 | 2874136 | 2678260 | 2678260 | 2212102 | 82,59474435 | 0        | 0,110966  | 9215604  | 0,000003 | 0,061085 | 0,10463  | 0,650265 | 0,184017 | 0,165716 | 0,163497  | 1,89511  |
| SRR1974652 | neurons | 3762490 | 3552877 | 3299270 | 3299270 | 2734410 | 82,84893325 | 0        | 0,120749  | 10387786 | 0,000006 | 0,112477 | 0,160761 | 0,605678 | 0,121078 | 0,273238 | 0,270505  | 1,29282  |
| SRR1974654 | neurons | 4040890 | 3796796 | 3468016 | 3468016 | 3000275 | 86,51272082 | 0        | 0,132193  | 10324236 | 0        | 0,187506 | 0,258537 | 0,404753 | 0,149205 | 0,446042 | 0,441409  | 0,804405 |
| SRR1974655 | neurons | 3296498 | 3106191 | 2888683 | 2888683 | 2471230 | 85,54867391 | 0        | 0,086251  | 13489578 | 0,000007 | 0,064056 | 0,079669 | 0,716001 | 0,140268 | 0,143275 | 0,142245  | 1,267198 |
| SRR1974656 | neurons | 3102293 | 2941851 | 2761055 | 2761055 | 2399992 | 85,83646468 | 0        | 0,087257  | 12778498 | 0,000003 | 0,069625 | 0,087257 | 0,695315 | 0,147805 | 0,156877 | 0,155291  | 1,425503 |
| SRR1974657 | neurons | 4245180 | 3979294 | 3639650 | 3639650 | 3116118 | 85,61586966 | 0        | 0,108322  | 13324923 | 0,000031 | 0,082673 | 0,123051 | 0,640637 | 0,153608 | 0,205724 | 0,203683  | 1,31809  |
| SRR1974658 | neurons | 4086581 | 3850836 | 3608008 | 3608008 | 3090388 | 85,65357948 | 0        | 0,103684  | 13853871 | 0        | 0,161056 | 0,226645 | 0,502512 | 0,109786 | 0,387701 | 0,383765  | 0,747156 |
| SRR1974659 | neurons | 3951135 | 3778308 | 3608620 | 3608620 | 3117040 | 86,37761804 | 0        | 0,100048  | 14520424 | 0,000003 | 0,204223 | 0,181819 | 0,499161 | 0,114793 | 0,386043 | 0,382259  | 0,759205 |
| SRR1974660 | neurons | 3869448 | 3626415 | 3378490 | 3378490 | 2929645 | 86,71462695 | 0        | 0,091734  | 14975958 | 0        | 0,077156 | 0,098565 | 0,701907 | 0,122372 | 0,175721 | 0,174027  | 1,024689 |
| SRR1974661 | neurons | 3909246 | 3698544 | 3442975 | 3442975 | 2995088 | 86,99127954 | 0        | 0,094588  | 14817411 | 0        | 0,039398 | 0,065223 | 0,714801 | 0,180588 | 0,10461  | 0,103622  | 1,60447  |
| SRR1974662 | neurons | 3356032 | 3303535 | 3094922 | 3094922 | 2669007 | 86,24941006 | 0        | 0,060838  | 14491698 | 0        | 0,107897 | 0,164424 | 0,613383 | 0,114796 | 0,271822 | 0,268953  | 0,798131 |
| SRR1974663 | neurons | 3150734 | 2978679 | 2779476 | 2779476 | 2266871 | 81,62945102 | 0        | 0,114643  | 9223645  | 0,000003 | 0,109465 | 0,160534 | 0,605523 | 0,124475 | 0,269989 | 0,2657239 | 1,552217 |
| SRR1974673 | neurons | 1949313 | 1649705 | 1530744 | 1530744 | 1003827 | 85,57771907 | 0        | 0,110664  | 4194278  | 0        | 0,043439 | 0,139514 | 0,686222 | 0,136825 | 0,176953 | 0,175754  | 2,779716 |
| SRR1974674 | neurons | 3091012 | 2675820 | 2494267 | 2494267 | 2254258 | 90,37757385 | 0        | 0,087317  | 12145578 | 0        | 0,138908 | 0,213445 | 0,538315 | 0,109431 | 0,352253 | 0,350732  | 0,809147 |
| SRR1974677 | neurons | 1771276 | 1570935 | 1455100 | 1455100 | 1319397 | 90,66985087 | 0,000009 | 0,037013  | 17380296 | 0        | 0,111682 | 0,15366  | 0,620947 | 0,265342 | 0,264246 | 0,264246  | 1,076202 |
| SRR1974681 | neurons | 6317620 | 5921860 | 5688714 | 5688714 | 4097175 | 72,02286844 | 0        | 0,123193  | 15241147 | 0,000001 | 0,217309 | 0,290639 | 0,359923 | 0,132129 | 0,507948 | 0,502002  | 0,74261  |
| SRR1974684 | neurons | 2417069 | 2258486 | 2166315 | 2166315 | 1642282 | 75,80939353 | 0        | 0,098074  | 7817377  | 0        | 0,135329 | 0,20034  | 0,548172 | 0,161158 | 0,335669 | 0,331634  | 0,761306 |
| SRR1974686 | neurons | 9067868 | 8591035 | 8294661 | 8294661 | 6104513 | 72,51065475 | 0,000035 | 0,12425   | 22127669 | 0,000035 | 0,198921 | 0,224782 | 0,4574   | 0,118863 | 0,423703 | 0,418762  | 0,684232 |
| SRR1974697 | neurons | 6923302 | 6534059 | 6256604 | 6256604 | 4485168 | 71,69840035 | 0,000005 | 0,094004  | 2326514  | 0,000005 | 0,054231 | 0,07514  | 0,716619 | 0,154004 | 0,129371 | 0,127823  | 1,209784 |
| SRR1974704 | neurons | 7153830 | 6726417 | 6480198 | 6480198 | 4869307 | 75,14133056 | 0,000002 | 0,104432  | 21665746 | 0,000002 | 0,154635 | 0,178072 | 0,541212 | 0,126079 | 0,332703 | 0,328833  | 0,668951 |
| SRR1974705 | neurons | 7751646 | 7319943 | 7039639 | 7039639 | 4950765 | 70,32697273 | 0        | 0,133555  | 16851892 | 0        | 0,210341 | 0,232106 | 0,432741 | 0,124812 | 0,442447 | 0,437193  | 0,812861 |
| SRR1974706 | neurons | 9039553 | 8614314 | 8321842 | 8321842 | 5984616 | 71,91458333 | 0,000004 | 0,136642  | 19859205 | 0,000004 | 0,135427 | 0,14746  | 0,584458 | 0,132652 | 0,282886 | 0,279911  | 0,764986 |
| SRR1974707 | neurons | 4936463 | 4603262 | 434908  | 434908  | 3004605 | 69,318516   | 0,000006 | 0,118641  | 11648025 | 0,000006 | 0,064637 | 0,108511 | 0,654058 | 0,172788 | 0,173148 | 0,171043  | 1,692129 |
| SRR1974709 | neurons | 9006518 | 8538544 | 8283612 | 8283612 | 5812225 | 70,54859484 | 0        | 0,151392  | 12172184 | 0        | 0,213135 | 0,247938 | 0,419986 | 0,118941 | 0,461072 | 0,45593   | 0,771189 |
| SRR1974710 | neurons | 5617948 | 5185446 | 4892762 | 4892762 | 3225962 | 65,9331129  | 0,000001 | 0,163651  | 8752677  | 0,000001 | 0,049068 | 0,087471 | 0,629787 | 0,136539 | 0,13474  | 0,2042855 | 0,71189  |
| SRR1974711 | neurons | 5633435 | 5380896 | 5197953 | 5197953 | 2901765 | 55,82514886 | 0,000009 | 0,174472  | 7320711  | 0,000009 | 0,125469 | 0,165249 | 0,51271  | 0,196482 | 0,290718 | 0,287529  | 1,940326 |
| SRR1974712 | neurons | 5531513 | 5206747 | 5002308 | 5002308 | 3777250 | 75,51014452 | 0        | 0,099709  | 17670117 | 0        | 0,176759 | 0,191237 | 0,508621 | 0,123382 | 0,367997 | 0,36372   | 0,805026 |
| SRR1974713 | neurons | 5299945 | 5017726 | 4855318 | 4855318 | 3574712 | 73,62467299 | 0,000015 | 0,109082  | 15178664 | 0,000015 | 0,267691 | 0,285519 | 0,344528 | 0,102246 | 0,553211 | 0,546836  | 0,660253 |
| SRR1974714 | neurons | 5993490 | 5608848 | 5382622 | 5382622 | 3808217 | 70,75022173 | 0,000083 | 0,110105  | 16002475 | 0,000083 | 0,053934 | 0,088837 | 0,683154 | 0,173994 | 0,142772 | 0,141414  | 1,615973 |
| SRR1974718 | neurons | 4504644 | 4060831 | 3863509 | 3863509 | 2408399 | 73,51863293 | 0,00001  | 0,077787  | 17362688 | 0,00001  | 0,085068 | 0,099848 | 0,667752 | 0,147322 | 0,184917 | 0,18284   | 1,016947 |
| SRR1974724 | neurons | 6723320 | 6346602 | 6128939 | 6128939 | 4496264 | 73,36121309 | 0,000002 | 0,104116  | 20078539 | 0,000002 | 0,144644 | 0,178628 | 0,558396 | 0,132372 | 0,319629 | 0,319629  | 0,74534  |
| SRR1974730 | neurons | 7451006 | 7047702 | 6780140 | 6780140 | 4795401 | 70,72176788 | 0,000028 | 0,11067   | 20048304 | 0,000028 | 0,089652 | 0,095075 | 0,680319 | 0,134926 | 0,184278 | 0,182749  | 1,028838 |
| SRR1974735 | neurons | 5628127 | 5322132 | 5138600 | 5138600 | 3763600 | 73,241739   | 0,000001 | 0,1087357 | 20278490 | 0,000001 | 0,159497 | 0,19403  | 0,528774 | 0,117698 | 0,353527 | 0,349143  | 0,715906 |
| SRR1974752 | neurons | 7608158 | 7184606 | 6919490 | 6919490 | 5013447 | 72,48070679 | 0,000013 | 0,108339  | 21449835 | 0,000013 | 0,151551 | 0,135979 | 0,554975 | 0,157482 | 0,28753  | 0,284363  | 0,765624 |
| SRR1974756 | neurons | 1398119 | 1313357 | 1221339 | 1221339 | 1096417 | 89,77171776 | 0,000044 | 0,056344  | 9360582  | 0,000044 | 0,126192 | 0,217818 | 0,535928 | 0,120062 | 0,34401  | 0,34161   | 0,829142 |
| SRR1974759 | neurons | 1554200 | 1461379 | 1366222 | 1366222 | 1219730 | 89,27758446 | 0,000045 | 0,044525  | 13287337 | 0,000045 | 0,145384 | 0,199921 | 0,512978 | 0,141717 | 0,345305 | 0,342425  | 0,855801 |
| SRR1974762 | neurons | 1579939 | 1504288 | 1427694 | 1427694 | 1257775 | 88,09836001 | 0,000039 | 0,057843  | 10448959 | 0,000039 | 0,245091 | 0,370575 | 0,275668 | 0,108629 | 0,615665 | 0,610125  | 0,88744  |
| SRR1974763 | neurons | 1771555 | 1662892 | 1562627 | 1562627 | 1399296 | 89,91362022 | 0,00001  | 0,051504  | 13113668 | 0,00001  | 0,166885 | 0,264382 | 0,447276 | 0,121457 | 0,431267 | 0,42742   | 0,79059  |
| SRR1974767 | neurons | 1754929 | 1631318 | 1468353 | 1468353 | 1267098 | 86,29382717 | 0,000001 | 0,148191  | 1261986  | 0,000001 | 0,152475 | 0,251279 | 0,328966 | 0,262779 | 0,403754 | 0,399886  | 1,519313 |
| SRR1974773 | neurons | 1638333 | 1545756 | 1451410 | 1451410 | 1266246 | 87,24247454 | 0,000008 | 0,065885  | 9128285  | 0,000008 | 0,206999 | 0,295101 | 0,386403 | 0,111497 | 0,5021   | 0,497647  | 1,014143 |
| SRR1974775 | neurons | 1758607 | 1656563 | 1553070 | 1553070 | 1377698 | 88,70804278 | 0,000015 | 0,0565    | 11728315 | 0,000015 | 0,183979 | 0,307911 | 0,410755 | 0,097355 | 0,491859 | 0,487411  | 1,037597 |
| SRR1974776 | neurons | 1713239 | 1601924 | 1492226 | 1492226 | 1278008 | 85,64439971 | 0,000019 | 0,08219   | 7342569  | 0,000019 | 0,21992  | 0,331914 | 0,340728 | 0,107438 | 0,551834 | 0,546541  | 1,292399 |
| SRR1974777 | neurons | 1904235 | 1792812 | 1668809 | 1668809 | 1501189 | 88,99579028 | 0,000019 | 0,073239  | 9741861  | 0,000019 | 0,242876 | 0,378299 | 0,280184 | 0,098641 | 0,621175 | 0,616035  | 0,883404 |
| SRR1974778 | neurons | 2064601 | 1966325 | 1842452 | 1842452 | 1629367 | 88,3470549  | 0,000001 | 0,075674  | 10215498 | 0,000001 | 0,198726 | 0,263578 | 0,412075 | 0,125672 | 0,458204 | 0,458204  | 0,98524  |
| SRR1974779 | neurons | 1534279 | 1450278 | 1358075 | 1358075 | 1214234 | 89,40846419 | 0,000007 | 0,063007  | 9226593  | 0,000007 | 0,185885 | 0,302465 | 0,395947 | 0,115903 | 0,48815  | 0,484255  | 0,944794 |
| SRR1974780 | neurons | 1589934 | 1456761 | 1340159 | 1340159 | 1141829 | 85,20100973 | 0,000004 | 0,080534  | 6703165  | 0,000004 | 0,214474 | 0,345677 | 0,297    | 0,142848 | 0,560511 | 0,554716  | 1,34     |

|           |                  |         |         |         |         |         |             |          |          |          |          |          |          |          |          |          |          |          |
|-----------|------------------|---------|---------|---------|---------|---------|-------------|----------|----------|----------|----------|----------|----------|----------|----------|----------|----------|----------|
| SR1974828 | neurons          | 3035570 | 2887862 | 2702889 | 2702889 | 2302630 | 85,19143775 | 0        | 0,055604 | 19930648 | 0,000001 | 0,157058 | 0,216822 | 0,516003 | 0,110116 | 0,37388  | 0,370942 | 0,784393 |
| SR1974830 | neurons          | 2467804 | 2380854 | 2223523 | 2223523 | 1897357 | 85,33111643 | 0        | 0,076935 | 11690009 | 0,000005 | 0,132294 | 0,217556 | 0,359949 | 0,110195 | 0,34985  | 0,307395 | 0,848639 |
| SR1974832 | neurons          | 2603652 | 2473749 | 2314792 | 2314792 | 1952869 | 84,3647723  | 0        | 0,051015 | 18483423 | 0,000007 | 0,161335 | 0,208988 | 0,49689  | 0,13278  | 0,370323 | 0,367228 | 0,782802 |
| SR1974835 | neurons          | 1599438 | 1522229 | 1425469 | 1425469 | 102856  | 84,38317494 | 0        | 0,059614 | 9683644  | 0,000001 | 0,193845 | 0,298275 | 0,385869 | 0,12201  | 0,48803  | 0,36658  | 0,83658  |
| SR1974838 | neurons          | 2663670 | 2552693 | 2377718 | 2377718 | 2003117 | 84,24535626 | 0        | 0,075521 | 12585555 | 0,000004 | 0,13033  | 0,238739 | 0,5017   | 0,129228 | 0,369609 | 0,366188 | 0,874519 |
| SR1974841 | neurons          | 2982183 | 2856770 | 2656947 | 2656947 | 2286215 | 86,04669194 | 0        | 0,099616 | 11985660 | 0,0      | 0,099616 | 0,203977 | 0,566746 | 0,129661 | 0,303593 | 0,301319 | 0,910969 |
| SR1974842 | neurons          | 2505232 | 2394252 | 2229474 | 2229474 | 1927980 | 86,47689993 | 0        | 0,071187 | 12891080 | 0,00001  | 0,144271 | 0,24128  | 0,493434 | 0,121004 | 0,385551 | 0,382604 | 0,788741 |
| SR1974843 | neurons          | 3405228 | 3243333 | 2969044 | 2969044 | 2310165 | 77,80837872 | 0        | 0,1931   | 5184201  | 0,000001 | 0,112286 | 0,245774 | 0,428636 | 0,123303 | 0,35806  | 0,355081 | 1,560552 |
| SR1974844 | neurons          | 2120572 | 2038363 | 1943055 | 1943055 | 1595491 | 82,1124981  | 0        | 0,054688 | 14050423 | 0        | 0,212902 | 0,20125  | 0,482008 | 0,103841 | 0,414152 | 0,410693 | 0,899185 |
| SR1974847 | neurons          | 3568699 | 3412315 | 3165043 | 3165043 | 2592544 | 81,91180973 | 0        | 0,115273 | 10363319 | 0,000002 | 0,103396 | 0,164433 | 0,557608 | 0,174561 | 0,267829 | 0,265712 | 1,414421 |
| SR1974848 | neurons          | 2163046 | 2048975 | 1895657 | 1895657 | 1619883 | 85,45232603 | 0        | 0,055511 | 14140841 | 0,000002 | 0,128215 | 0,213473 | 0,533308 | 0,125003 | 0,341687 | 0,338735 | 0,90563  |
| SR1974849 | neurons          | 3287927 | 3182019 | 2977121 | 2977121 | 2504285 | 84,1176761  | 0        | 0,128517 | 8889033  | 0        | 0,105471 | 0,201082 | 0,55067  | 0,142778 | 0,306553 | 0,304469 | 1,151931 |
| SR1974853 | neurons          | 1469748 | 1344468 | 1237798 | 1237798 | 1065419 | 86,07373739 | 0        | 0,032184 | 16195134 | 0        | 0,11015  | 0,160835 | 0,603024 | 0,125991 | 0,270985 | 0,268705 | 0,835649 |
| SR1974854 | neurons          | 3985796 | 3845974 | 3594641 | 3594641 | 3077371 | 85,60996773 | 0        | 0,118657 | 11920021 | 0,000007 | 0,113048 | 0,206975 | 0,571235 | 0,108735 | 0,320023 | 0,31792  | 0,965514 |
| SR1974864 | neurons          | 2317684 | 1933772 | 1749546 | 1749546 | 1413030 | 80,76552441 | 0        | 0,070414 | 9556893  | 0        | 0,156178 | 0,236094 | 0,476838 | 0,130889 | 0,392274 | 0,389755 | 1,407887 |
| SR1974866 | neurons          | 2243813 | 1905796 | 1774850 | 1774850 | 1454551 | 81,95346086 | 0        | 0,053232 | 13173035 | 0,000002 | 0,083462 | 0,203074 | 0,703074 | 0,161933 | 0,134991 | 0,134221 | 2,137881 |
| SR1974867 | neurons          | 1887500 | 1632462 | 1518948 | 1518948 | 1330966 | 81,59786378 | 0        | 0,093447 | 19430972 | 0        | 0,13007  | 0,142468 | 0,605421 | 0,122123 | 0,272749 | 0,273449 | 0,909799 |
| SR1974869 | neurons          | 1183589 | 963133  | 880340  | 880340  | 599964  | 85,13139605 | 0        | 0,075207 | 50144496 | 0        | 0,056641 | 0,158667 | 0,444823 | 0,215311 | 0,213282 | 0,223315 | 2,23315  |
| SR1974870 | neurons          | 1325476 | 1071756 | 970506  | 970506  | 565259  | 88,24374089 | 0        | 0,138423 | 1848656  | 0        | 0,095503 | 0,144891 | 0,417833 | 0,341773 | 0,240394 | 0,238183 | 2,591306 |
| SR1974872 | neurons          | 1369293 | 1110722 | 1016501 | 1016501 | 665218  | 65,44194251 | 0        | 0,063167 | 5041372  | 0,000002 | 0,167829 | 0,262419 | 0,367952 | 0,201799 | 0,430248 | 0,426979 | 1,744753 |
| SR1974543 | oligodendrocytes | 2680235 | 2585008 | 2415025 | 2415025 | 2106633 | 97,23077712 | 0        | 0,280355 | 2015986  | 0,000001 | 0,141482 | 0,344028 | 0,424438 | 0,148511 | 0,482196 | 0,512344 | 1,532344 |
| SR1974545 | oligodendrocytes | 2627589 | 2511431 | 2342561 | 2342561 | 1987504 | 84,84321219 | 0        | 0,208711 | 4072854  | 0        | 0,116924 | 0,279943 | 0,517349 | 0,085784 | 0,398687 | 0,394077 | 1,821148 |
| SR1974548 | oligodendrocytes | 2698813 | 2597446 | 2388670 | 2388670 | 2025406 | 84,79220654 | 0        | 0,282347 | 2873895  | 0        | 0,065518 | 0,192234 | 0,527752 | 0,255694 | 0,146728 | 0,255694 | 2,116693 |
| SR1974549 | oligodendrocytes | 2133378 | 2031774 | 1893925 | 1893925 | 1673740 | 88,37414364 | 0        | 0,116933 | 6587290  | 0,000003 | 0,158173 | 0,320185 | 0,415886 | 0,105753 | 0,478358 | 0,474861 | 1,928889 |
| SR1974553 | oligodendrocytes | 1935800 | 1837429 | 1708706 | 1708706 | 1517886 | 88,32484893 | 0        | 0,113032 | 6198280  | 0,000032 | 0,14173  | 0,320372 | 0,445384 | 0,092482 | 0,462101 | 0,458578 | 1,474635 |
| SR1974561 | oligodendrocytes | 2847157 | 2753719 | 2590008 | 2590008 | 2290611 | 88,81748331 | 0        | 0,251092 | 3760644  | 0,000002 | 0,154992 | 0,354349 | 0,400546 | 0,090111 | 0,509341 | 0,50609  | 1,391732 |
| SR1974562 | oligodendrocytes | 2514707 | 2417752 | 2262881 | 2262881 | 2003855 | 88,5326462  | 0        | 0,165463 | 5367091  | 0        | 0,106775 | 0,26874  | 0,500489 | 0,123996 | 0,375516 | 0,373159 | 1,451307 |
| SR1974563 | oligodendrocytes | 2173354 | 2073937 | 1927109 | 1927109 | 1731682 | 89,85905831 | 0        | 0,119724 | 6642426  | 0        | 0,127535 | 0,358207 | 0,372615 | 0,096643 | 0,530742 | 0,526987 | 1,187625 |
| SR1974564 | oligodendrocytes | 3127747 | 3017406 | 2834616 | 2834616 | 2373313 | 83,72608494 | 0,000002 | 0,262625 | 3686801  | 0,000002 | 0,154197 | 0,378805 | 0,345375 | 0,121621 | 0,533002 | 0,529607 | 1,529092 |
| SR1974566 | oligodendrocytes | 1532496 | 1456851 | 1345119 | 1345119 | 1210170 | 89,96750473 | 0        | 0,155865 | 3642770  | 0        | 0,080258 | 0,244693 | 0,567486 | 0,107563 | 0,324951 | 0,322729 | 1,496466 |
| SR1974570 | oligodendrocytes | 2017136 | 1919863 | 1751118 | 1751118 | 1454897 | 83,08389269 | 0        | 0,195681 | 3214833  | 0        | 0,247886 | 0,263267 | 0,243957 | 0,24489  | 0,507026 | 0,507026 | 1,950509 |
| SR1974571 | oligodendrocytes | 2921882 | 2820204 | 2631015 | 2631015 | 2352412 | 89,41081674 | 0        | 0,122414 | 4447254  | 0,000001 | 0,090021 | 0,256593 | 0,582251 | 0,071133 | 0,346614 | 0,344339 | 1,468159 |
| SR1974572 | oligodendrocytes | 2420738 | 2305722 | 2142284 | 2142284 | 1920765 | 89,65968098 | 0        | 0,107695 | 8265189  | 0        | 0,122361 | 0,228188 | 0,514593 | 0,134858 | 0,350549 | 0,34808  | 1,235379 |
| SR1974573 | oligodendrocytes | 3032024 | 2920979 | 2735452 | 2735452 | 2446209 | 89,42613506 | 0        | 0,21994  | 4711681  | 0,000006 | 0,106524 | 0,26057  | 0,542912 | 0,089988 | 0,367094 | 0,364532 | 1,379494 |
| SR1974574 | oligodendrocytes | 2538335 | 2417722 | 2253995 | 2253995 | 1981120 | 87,89371776 | 0        | 0,107997 | 5476122  | 0        | 0,130797 | 0,384615 | 0,358516 | 0,085873 | 0,555611 | 0,555611 | 1,250825 |
| SR1974616 | oligodendrocytes | 399914  | 347791  | 306791  | 306791  | 240195  | 78,29271393 | 0        | 0,034093 | 3442101  | 0        | 0,21911  | 0,212348 | 0,468193 | 0,100349 | 0,431459 | 0,425123 | 1,244749 |
| SR1974690 | oligodendrocytes | 8003880 | 7605381 | 7308229 | 7308229 | 4389817 | 60,06676857 | 0        | 0,1456   | 9736980  | 0        | 0,1456   | 0,167853 | 0,546458 | 0,140089 | 0,313453 | 0,310044 | 1,517923 |
| SR1974760 | oligodendrocytes | 2003724 | 1838202 | 1707559 | 1707559 | 1489078 | 87,20506876 | 0        | 0,088891 | 7871757  | 0        | 0,207704 | 0,314464 | 0,351818 | 0,126015 | 0,521267 | 0,517595 | 1,15681  |
| SR1974765 | oligodendrocytes | 1723473 | 1580145 | 1461243 | 1461243 | 1250773 | 85,59650927 | 0        | 0,081843 | 7218421  | 0        | 0,118693 | 0,238692 | 0,517235 | 0,125381 | 0,357384 | 0,353817 | 1,870071 |
| SR1974769 | oligodendrocytes | 2137381 | 2044242 | 1898889 | 1898889 | 1659597 | 87,20662451 | 0        | 0,066544 | 11188427 | 0        | 0,137672 | 0,216987 | 0,511736 | 0,133606 | 0,354658 | 0,351845 | 1,160104 |
| SR1974790 | oligodendrocytes | 1643902 | 1554191 | 1457594 | 1457594 | 1095200 | 75,13752115 | 0        | 0,1603   | 7119062  | 0        | 0,1603   | 0,194818 | 0,519469 | 0,125412 | 0,355118 | 0,352194 | 1,328722 |
| SR1974791 | oligodendrocytes | 1968871 | 1884993 | 1802260 | 1802260 | 1304870 | 72,4018732  | 0        | 0,123694 | 4830006  | 0        | 0,358977 | 0,424118 | 0,138672 | 0,078232 | 0,783096 | 0,777045 | 0,920096 |
| SR1974792 | oligodendrocytes | 2019163 | 1908821 | 1804158 | 1804158 | 1377194 | 76,33444521 | 0        | 0,062441 | 10564001 | 0        | 0,155439 | 0,187194 | 0,567002 | 0,090365 | 0,342633 | 0,337937 | 1,184949 |
| SR1974795 | oligodendrocytes | 929880  | 866970  | 814461  | 814461  | 603813  | 74,13651482 | 0        | 0,062405 | 4634414  | 0,000002 | 0,29965  | 0,370699 | 0,27826  | 0,05139  | 0,670349 | 0,664072 | 0,947655 |
| SR1974796 | oligodendrocytes | 1826021 | 1721409 | 1613501 | 1613501 | 1327557 | 82,27804011 | 0,000002 | 0,062754 | 10130225 | 0,000002 | 0,197897 | 0,251946 | 0,449771 | 0,100385 | 0,449843 | 0,449843 | 0,899439 |
| SR1974797 | oligodendrocytes | 1650841 | 1545927 | 1460228 | 1460228 | 1064060 | 72,86944231 | 0        | 0,059421 | 8959525  | 0,00002  | 0,143265 | 0,18628  | 0,535868 | 0,134567 | 0,329545 | 0,326893 | 1,436768 |
| SR1974802 | oligodendrocytes | 2690742 | 2571547 | 2403833 | 2403833 | 1748101 | 72,72139953 | 0        | 0,172254 | 4473016  | 0        | 0,205655 | 0,495286 | 0,21671  | 0,082349 | 0,709441 | 0,694471 | 1,445455 |
| SR1974805 | oligodendrocytes | 3308063 | 3153106 | 2928129 | 2928129 | 2396103 | 81,83051361 | 0        | 0,125907 | 8969881  | 0,000011 | 0,139222 | 0,302714 | 0,472266 | 0,085787 | 0,441935 | 0,438211 | 1,255421 |
| SR1974812 | oligodendrocytes | 2880343 | 2744003 | 2540649 | 2540649 | 2160866 | 85,02103203 | 0        | 0,086511 | 11753553 | 0,000005 | 0,145206 | 0,262386 | 0,481426 | 0,110977 | 0,407592 | 0,404103 | 0,90447  |
| SR1974827 | oligodendrocytes | 2023199 | 1935620 | 1831289 | 1831289 | 1407318 | 86,44849306 | 0,000009 | 0,088688 | 7457719  | 0        | 0,278935 | 0,249838 | 0,377528 | 0,09369  | 0,528773 | 0,523678 | 1,152507 |
| SR1974829 | oligodendrocytes | 2201174 | 2094773 | 1951834 | 1951834 | 1632127 | 83,16368093 | 0        | 0,077942 | 9864552  | 0        | 0,23791  | 0,338026 | 0,331001 | 0,107182 | 0,561817 | 0,556585 | 0,768422 |
| SR1974831 | oligodendrocytes | 2818544 | 2709472 | 2552717 | 2552717 | 2006203 | 86,59808963 | 0        | 0,128316 | 7133322  | 0        | 0,272593 | 0,420716 | 0,251137 | 0,055553 | 0,693309 | 0,687777 | 1,044285 |
| SR1974834 | oligodendrocytes | 3177746 | 3045966 | 2859310 | 2859310 | 2267648 | 79,29365937 | 0        | 0,119051 | 8751962  | 0        |          |          |          |          |          |          |          |
