# Supplementary material for: Single-cell transcriptomics reveals specific RNA editing signatures in the human brain
Source: PubMed Central journal article supplement (PMC5435858; doi:10.1261/rna.058271.116), 2017-06
Supplement: supp_058271.116_Supplemental_Table_2.pdf [file supp_058271.116_Supplemental_Table_2.pdf]

|             |             |     |     |             |             |             |   |             |            |             |
|-------------|-------------|-----|-----|-------------|-------------|-------------|---|-------------|------------|-------------|
| SRR1975000  | 555         | 531 | 531 | 24          | 0,956756757 | 0,999933255 | 0 | 1515606     | 1348581    | 0,889796557 |
| SRR1975002  | 422         | 412 | 412 | 10          | 0,976303318 | 0,999869558 | 0 | 1575212     | 1363204    | 0,865409862 |
| SRR1975003  | 313         | 306 | 304 | 7           | 0,971246006 | 0,999950209 | 0 | 1196251     | 1023376    | 0,855486014 |
| SRR1975004  | 345         | 336 | 336 | 9           | 0,973913043 | 0,999912593 | 0 | 1207744     | 1055675    | 0,874088383 |
| SRR1975005  | 420         | 408 | 407 | 12          | 0,969047619 | 0,999894555 | 0 | 1503837     | 1279895    | 0,851086255 |
| SRR1975006  | 216         | 212 | 209 | 4           | 0,967592593 | 0,999964666 | 0 | 1464404     | 1133592    | 0,774097858 |
| SRR1975007  | 605         | 579 | 579 | 26          | 0,957024793 | 0,999693276 | 0 | 1991849     | 1773147    | 0,890201516 |
| SRR1975008  | 417         | 402 | 402 | 15          | 0,964028777 | 0,999879087 | 0 | 1486232     | 1275157    | 0,857979777 |
| <b>Mean</b> | 1256,172324 |     |     | 48,61357702 | 0,957885214 |             |   | 2585965,653 | 2111373,82 | 0,833500257 |
