# Supplementary material for: Single-cell transcriptomics reveals specific RNA editing signatures in the human brain
Source: PubMed Central journal article supplement (PMC5435858; doi:10.1261/rna.058271.116), 2017-06
Supplement: supp_058271.116_Supplemental_Table_3.pdf [file supp_058271.116_Supplemental_Table_3.pdf]

| Chr   | Coordinate (hg19) | Location | GeneName | ChangeType | Aachange | TypeGenomicRegion |
|-------|-------------------|----------|----------|------------|----------|-------------------|
| chr1  | 2436080           | exonic   | PLCH2    | nonsyn     | RG       | NONREP            |
| chr1  | 12091858          | exonic   | MIIP     | nonsyn     | SG       | NONREP            |
| chr1  | 21219204          | exonic   | EIF4G3   | nonsyn     | RG       | NONREP            |
| chr1  | 22970557          | exonic   | C1QC     | nonsyn     | KR       | NONREP            |
| chr1  | 35485995          | exonic   | ZMYM6    | nonsyn     | EG       | NONREP            |
| chr1  | 55075206          | exonic   | FAM151A  | nonsyn     | LP       | NONREP            |
| chr1  | 110256304         | exonic   | GSTM5    | nonsyn     | KR       | NONREP            |
| chr1  | 113242909         | exonic   | MOV10    | nonsyn     | QR       | NONREP            |
| chr1  | 155279696         | exonic   | FDPS     | nonsyn     | YC       | NONREP            |
| chr1  | 156703904         | exonic   | RRNAD1   | nonsyn     | QR       | NONREP            |
| chr1  | 160302244         | exonic   | COPA     | nonsyn     | IV       | NONREP            |
| chr1  | 160327023         | exonic   | NCSTN    | nonsyn     | IV       | NONREP            |
| chr1  | 240370872         | exonic   | FMN2     | nonsyn     | IM       | NONREP            |
| chr10 | 22022441          | exonic   | MLLT10   | nonsyn     | TA       | NONREP            |
| chr10 | 79397298          | exonic   | KCNMA1   | nonsyn     | SG       | NONREP            |
| chr10 | 79595574          | exonic   | DLG5     | nonsyn     | EG       | NONREP            |
| chr10 | 99424675          | exonic   | PI4K2A   | nonsyn     | IV       | NONREP            |
| chr10 | 101089862         | exonic   | CNNM1    | nonsyn     | SG       | NONREP            |
| chr10 | 102684025         | exonic   | FAM178A  | nonsyn     | SG       | NONREP            |
| chr11 | 6567089           | exonic   | DNHD1    | nonsyn     | IM       | NONREP            |
| chr11 | 8158982           | exonic   | RIC3     | nonsyn     | KR       | NONREP            |
| chr11 | 46388498          | exonic   | DGKZ     | nonsyn     | KR       | NONREP            |
| chr11 | 60775067          | exonic   | CD6      | nonsyn     | SG       | NONREP            |
| chr11 | 61724916          | exonic   | BEST1    | nonsyn     | IV       | NONREP            |
| chr11 | 62397341          | exonic   | GANAB    | nonsyn     | QR       | NONREP            |
| chr11 | 62416683          | exonic   | INTS5    | nonsyn     | KR       | NONREP            |
| chr11 | 62751512          | exonic   | SLC22A6  | nonsyn     | LP       | NONREP            |
| chr11 | 62752074          | exonic   | SLC22A6  | nonsyn     | LP       | NONREP            |
| chr11 | 71712486          | exonic   | IL18BP   | nonsyn     | KR       | NONREP            |
| chr11 | 105804694         | exonic   | GRIA4    | nonsyn     | RG       | NONREP            |
| chr12 | 5021742           | exonic   | KCNA1    | nonsyn     | IV       | NONREP            |
| chr12 | 7028883           | exonic   | ENO2     | nonsyn     | DG       | NONREP            |
| chr12 | 27181356          | exonic   | MED21    | nonsyn     | RG       | NONREP            |
| chr12 | 49176985          | exonic   | ADCY6    | nonsyn     | KR       | NONREP            |
| chr12 | 49315152          | exonic   | CCDC65   | nonsyn     | YH       | NONREP            |
| chr12 | 50475424          | exonic   | ASIC1    | nonsyn     | TA       | NONREP            |
| chr12 | 57864624          | exonic   | GLI1     | nonsyn     | RG       | NONREP            |
| chr12 | 69651595          | exonic   | CPSF6    | nonsyn     | RG       | NONREP            |
| chr12 | 109665188         | exonic   | ACACB    | nonsyn     | RG       | NONREP            |
| chr12 | 133696901         | exonic   | ZNF891   | nonsyn     | KR       | NONREP            |
| chr12 | 133696925         | exonic   | ZNF891   | nonsyn     | QR       | NONREP            |
| chr12 | 133696983         | exonic   | ZNF891   | nonsyn     | RG       | NONREP            |
| chr12 | 133697025         | exonic   | ZNF891   | nonsyn     | RG       | NONREP            |
| chr12 | 133697033         | exonic   | ZNF891   | nonsyn     | KR       | NONREP            |
| chr12 | 133697118         | exonic   | ZNF891   | nonsyn     | SG       | NONREP            |
| chr12 | 133697486         | exonic   | ZNF891   | nonsyn     | KR       | NONREP            |
| chr13 | 46090371          | exonic   | COG3     | nonsyn     | IV       | NONREP            |
| chr14 | 20920211          | exonic   | OSGEP    | nonsyn     | IM       | NONREP            |
| chr14 | 26917515          | exonic   | NOVA1    | nonsyn     | TA       | NONREP            |
| chr14 | 26917530          | exonic   | NOVA1    | nonsyn     | SG       | NONREP            |

|       |          |        |         |        |    |        |
|-------|----------|--------|---------|--------|----|--------|
| chr14 | 93142915 | exonic | RIN3    | nonsyn | MV | NONREP |
| chr14 | 95912401 | exonic | SYNE3   | nonsyn | KE | NONREP |
| chr15 | 65426067 | exonic | PDCD7   | nonsyn | QR | NONREP |
| chr15 | 75646086 | exonic | NEIL1   | nonsyn | KR | NONREP |
| chr15 | 80465406 | exonic | FAH     | nonsyn | KE | NONREP |
| chr15 | 82336645 | exonic | MEX3B   | nonsyn | QR | NONREP |
| chr16 | 1827756  | exonic | SPSB3   | nonsyn | KR | NONREP |
| chr16 | 20331702 | exonic | GP2     | nonsyn | EG | NONREP |
| chr16 | 23079791 | exonic | USP31   | nonsyn | KR | NONREP |
| chr16 | 30594639 | exonic | ZNF785  | nonsyn | RG | NONREP |
| chr16 | 57717870 | exonic | GPR97   | nonsyn | EG | NONREP |
| chr16 | 67237571 | exonic | ELMO3   | nonsyn | YH | NONREP |
| chr17 | 4693397  | exonic | GLTPD2  | nonsyn | WR | NONREP |
| chr17 | 16347053 | exonic | FAM211A | nonsyn | LP | NONREP |
| chr17 | 19609985 | exonic | SLC47A2 | nonsyn | YH | NONREP |
| chr17 | 37826529 | exonic | PNMT    | nonsyn | SG | NONREP |
| chr17 | 38512342 | exonic | RARA    | nonsyn | EG | NONREP |
| chr17 | 42475813 | exonic | GPATCH8 | nonsyn | KR | NONREP |
| chr17 | 43045220 | exonic | C1QL1   | nonsyn | QR | NONREP |
| chr17 | 57697524 | exonic | CLTC    | nonsyn | EG | NONREP |
| chr17 | 64222153 | exonic | APOH    | nonsyn | ND | NONREP |
| chr17 | 73498270 | exonic | CASKIN2 | nonsyn | QR | NONREP |
| chr17 | 80441061 | exonic | NARF    | nonsyn | XW | ALU    |
| chr18 | 32825609 | exonic | ZNF397  | nonsyn | KE | NONREP |
| chr18 | 32825654 | exonic | ZNF397  | nonsyn | IV | NONREP |
| chr18 | 32825741 | exonic | ZNF397  | nonsyn | RG | NONREP |
| chr19 | 7585273  | exonic | ZNF358  | nonsyn | KR | NONREP |
| chr19 | 9639621  | exonic | ZNF426  | nonsyn | KR | NONREP |
| chr19 | 14593605 | exonic | GIPC1   | nonsyn | TA | NONREP |
| chr19 | 20807628 | exonic | ZNF626  | nonsyn | YC | NONREP |
| chr19 | 21607515 | exonic | ZNF493  | nonsyn | YC | NONREP |
| chr19 | 44351711 | exonic | ZNF283  | nonsyn | KE | NONREP |
| chr19 | 44777091 | exonic | ZNF233  | nonsyn | VA | NONREP |
| chr19 | 44777106 | exonic | ZNF233  | nonsyn | LP | NONREP |
| chr19 | 44777178 | exonic | ZNF233  | nonsyn | LP | NONREP |
| chr19 | 44792527 | exonic | ZNF235  | nonsyn | KR | NONREP |
| chr19 | 44792765 | exonic | ZNF235  | nonsyn | SG | NONREP |
| chr19 | 44792894 | exonic | ZNF235  | nonsyn | RG | NONREP |
| chr19 | 44793030 | exonic | ZNF235  | nonsyn | IM | NONREP |
| chr19 | 44793215 | exonic | ZNF235  | nonsyn | ND | NONREP |
| chr19 | 44793216 | exonic | ZNF235  | nonsyn | IM | NONREP |
| chr19 | 46271684 | exonic | SIX5    | nonsyn | YC | NONREP |
| chr19 | 46526033 | exonic | PGLYRP1 | nonsyn | YH | NONREP |
| chr19 | 47152737 | exonic | DACT3   | nonsyn | SG | NONREP |
| chr19 | 53993629 | exonic | ZNF813  | nonsyn | DG | NONREP |
| chr19 | 54485579 | exonic | CACNG8  | nonsyn | SG | NONREP |
| chr19 | 56895363 | exonic | ZNF582  | nonsyn | RG | NONREP |
| chr19 | 56896203 | exonic | ZNF582  | nonsyn | ND | NONREP |
| chr19 | 58196667 | exonic | ZNF551  | nonsyn | QR | NONREP |
| chr19 | 58290138 | exonic | ZNF586  | nonsyn | KR | NONREP |
| chr2  | 84867621 | exonic | DNAH6   | nonsyn | KR | NONREP |

|       |           |        |          |        |    |        |
|-------|-----------|--------|----------|--------|----|--------|
| chr2  | 208434976 | exonic | CREB1    | nonsyn | TA | NONREP |
| chr2  | 208434997 | exonic | CREB1    | nonsyn | TA | NONREP |
| chr2  | 208435003 | exonic | CREB1    | nonsyn | TA | NONREP |
| chr2  | 208435025 | exonic | CREB1    | nonsyn | QR | NONREP |
| chr2  | 208440032 | exonic | CREB1    | nonsyn | NS | NONREP |
| chr2  | 208440076 | exonic | CREB1    | nonsyn | TA | NONREP |
| chr2  | 210835613 | exonic | UNC80    | nonsyn | SG | NONREP |
| chr20 | 36147533  | exonic | BLCAP    | nonsyn | KR | NONREP |
| chr20 | 36147534  | exonic | BLCAP    | nonsyn | KE | NONREP |
| chr20 | 36147563  | exonic | BLCAP    | nonsyn | QR | NONREP |
| chr20 | 36147572  | exonic | BLCAP    | nonsyn | YC | NONREP |
| chr20 | 36393666  | exonic | CTNNBL1  | nonsyn | EG | NONREP |
| chr20 | 44439543  | exonic | DNTTIP1  | nonsyn | EG | NONREP |
| chr20 | 60737813  | exonic | SS18L1   | nonsyn | SG | NONREP |
| chr21 | 30953750  | exonic | GRIK1    | nonsyn | QR | NONREP |
| chr21 | 34922801  | exonic | SON      | nonsyn | TA | NONREP |
| chr21 | 34923275  | exonic | SON      | nonsyn | RG | NONREP |
| chr22 | 37962564  | exonic | CDC42EP1 | nonsyn | SG | NONREP |
| chr22 | 42992254  | exonic | POLDIP3  | nonsyn | TA | NONREP |
| chr3  | 9876560   | exonic | TTLL3    | nonsyn | KR | NONREP |
| chr3  | 14180692  | exonic | TMEM43   | nonsyn | RG | NONREP |
| chr3  | 48789722  | exonic | PRKAR2A  | nonsyn | QR | NONREP |
| chr3  | 53820892  | exonic | CACNA1D  | nonsyn | IM | NONREP |
| chr3  | 58141791  | exonic | FLNB     | nonsyn | MV | NONREP |
| chr3  | 58141801  | exonic | FLNB     | nonsyn | QR | NONREP |
| chr3  | 62423807  | exonic | CADPS    | nonsyn | EG | NONREP |
| chr3  | 148782634 | exonic | HLTF     | nonsyn | DG | NONREP |
| chr3  | 179093014 | exonic | MFN1     | nonsyn | IV | NONREP |
| chr3  | 179093066 | exonic | MFN1     | nonsyn | KR | NONREP |
| chr4  | 2835556   | exonic | SH3BP2   | nonsyn | RG | NONREP |
| chr4  | 17805279  | exonic | DCAF16   | nonsyn | IM | NONREP |
| chr4  | 57976234  | exonic | IGFBP7   | nonsyn | KR | NONREP |
| chr4  | 57976286  | exonic | IGFBP7   | nonsyn | RG | NONREP |
| chr4  | 76703983  | exonic | USO1     | nonsyn | KR | NONREP |
| chr4  | 77979680  | exonic | CCNI     | nonsyn | RG | NONREP |
| chr4  | 152200963 | exonic | PRSS48   | nonsyn | VA | NONREP |
| chr4  | 152200978 | exonic | PRSS48   | nonsyn | VA | NONREP |
| chr4  | 155507590 | exonic | FGA      | nonsyn | TA | NONREP |
| chr4  | 158257875 | exonic | GRIA2    | nonsyn | QR | NONREP |
| chr4  | 158281294 | exonic | GRIA2    | nonsyn | RG | NONREP |
| chr5  | 38949495  | exonic | RICTOR   | nonsyn | RG | NONREP |
| chr5  | 147862821 | exonic | HTR4     | nonsyn | QR | NONREP |
| chr5  | 156736808 | exonic | CYFIP2   | nonsyn | KE | NONREP |
| chr5  | 178413628 | exonic | GRM6     | nonsyn | CR | NONREP |
| chr6  | 27419515  | exonic | ZNF184   | nonsyn | HR | NONREP |
| chr6  | 33756242  | exonic | LEMD2    | nonsyn | SG | NONREP |
| chr6  | 34100903  | exonic | GRM4     | nonsyn | QR | NONREP |
| chr6  | 44120349  | exonic | TMEM63B  | nonsyn | QR | NONREP |
| chr6  | 73843194  | exonic | KCNQ5    | nonsyn | QR | NONREP |
| chr6  | 102337689 | exonic | GRIK2    | nonsyn | IV | NONREP |
| chr6  | 102337702 | exonic | GRIK2    | nonsyn | YC | NONREP |

|      |           |        |        |        |    |        |
|------|-----------|--------|--------|--------|----|--------|
| chr6 | 102372589 | exonic | GRIK2  | nonsyn | QR | NONREP |
| chr6 | 133072399 | exonic | VNN2   | nonsyn | KE | NONREP |
| chr7 | 39990299  | exonic | CDK13  | nonsyn | KR | NONREP |
| chr7 | 39990302  | exonic | CDK13  | nonsyn | KR | NONREP |
| chr7 | 39990344  | exonic | CDK13  | nonsyn | QR | NONREP |
| chr7 | 39990527  | exonic | CDK13  | nonsyn | KR | NONREP |
| chr7 | 39990548  | exonic | CDK13  | nonsyn | QR | NONREP |
| chr7 | 39990590  | exonic | CDK13  | nonsyn | KR | NONREP |
| chr7 | 39991045  | exonic | CDK13  | nonsyn | SG | NONREP |
| chr7 | 41729544  | exonic | INHBA  | nonsyn | SG | NONREP |
| chr7 | 100887329 | exonic | FIS1   | nonsyn | KR | NONREP |
| chr7 | 157333469 | exonic | PTPRN2 | nonsyn | EG | NONREP |
| chr8 | 10755755  | exonic | XKR6   | nonsyn | RG | NONREP |
| chr8 | 39027497  | exonic | ADAM32 | nonsyn | YC | NONREP |
| chr8 | 103841636 | exonic | AZIN1  | nonsyn | SG | NONREP |
| chr8 | 145579192 | exonic | FBXL6  | nonsyn | XW | NONREP |
| chr9 | 95027370  | exonic | IARS   | nonsyn | KR | NONREP |
| chr9 | 130438182 | exonic | STXBP1 | nonsyn | KE | NONREP |
| chr9 | 132571671 | exonic | TOR1B  | nonsyn | IV | NONREP |
| chrX | 2825467   | exonic | ARSD   | nonsyn | RG | NONREP |
| chrX | 49019255  | exonic | MAGIX  | nonsyn | ND | NONREP |
| chrX | 49019262  | exonic | MAGIX  | nonsyn | KR | NONREP |
| chrX | 100297260 | exonic | TRMT2B | nonsyn | RG | NONREP |
| chrX | 114082682 | exonic | HTR2C  | nonsyn | IV | NONREP |
| chrX | 114082684 | exonic | HTR2C  | nonsyn | IM | NONREP |
| chrX | 114082688 | exonic | HTR2C  | nonsyn | ND | NONREP |
| chrX | 114082689 | exonic | HTR2C  | nonsyn | NS | NONREP |
| chrX | 114082694 | exonic | HTR2C  | nonsyn | IV | NONREP |
| chrX | 122598962 | exonic | GRIA3  | nonsyn | RG | NONREP |
| chrX | 151358319 | exonic | GABRA3 | nonsyn | IM | NONREP |
| chrX | 153579950 | exonic | FLNA   | nonsyn | QR | NONREP |

| ID       | Symbol   | Entrez Gene Name                                                 | Location            | Type(s)                           |
|----------|----------|------------------------------------------------------------------|---------------------|-----------------------------------|
| ACACB    | ACACB    | acetyl-CoA carboxylase beta                                      | Cytoplasm           | enzyme                            |
| ADAM32   | ADAM32   | ADAM metallopeptidase domain 32                                  | Other               | peptidase                         |
| ADCY6    | ADCY6    | adenylate cyclase 6                                              | Plasma Membrane     | enzyme                            |
| GPR97    | ADGRG3   | adhesion G protein-coupled receptor G3                           | Plasma Membrane     | G-protein coupled receptor        |
| APOH     | APOH     | apolipoprotein H                                                 | Extracellular Space | transporter                       |
| ARSD     | ARSD     | arylsulfatase D                                                  | Cytoplasm           | enzyme                            |
| ASIC1    | ASIC1    | acid sensing ion channel subunit 1                               | Plasma Membrane     | ion channel                       |
| AZIN1    | AZIN1    | antizyme inhibitor 1                                             | Cytoplasm           | enzyme                            |
| BEST1    | BEST1    | bestrophin 1                                                     | Plasma Membrane     | ion channel                       |
| BLCAP    | BLCAP    | bladder cancer associated protein                                | Other               | other                             |
| C1QC     | C1QC     | complement component 1, q subcomponent, C chain                  | Extracellular Space | other                             |
| C1QL1    | C1QL1    | complement component 1, q subcomponent-like 1                    | Extracellular Space | other                             |
| CACNA1D  | CACNA1D  | calcium channel, voltage-dependent, L type, alpha 1D subunit     | Plasma Membrane     | ion channel                       |
| CACNG8   | CACNG8   | calcium channel, voltage-dependent, gamma subunit 8              | Plasma Membrane     | ion channel                       |
| CADPS    | CADPS    | Ca <sup>++</sup> -dependent secretion activator                  | Plasma Membrane     | other                             |
| CASKIN2  | CASKIN2  | CASK interacting protein 2                                       | Cytoplasm           | other                             |
| CCDC65   | CCDC65   | coiled-coil domain containing 65                                 | Other               | other                             |
| CCNI     | CCNI     | cyclin I                                                         | Other               | other                             |
| CD6      | CD6      | CD6 molecule                                                     | Plasma Membrane     | transmembrane receptor            |
| CDC42EP1 | CDC42EP1 | CDC42 effector protein 1                                         | Extracellular Space | other                             |
| CDK13    | CDK13    | cyclin-dependent kinase 13                                       | Nucleus             | kinase                            |
| CLTC     | CLTC     | clathrin, heavy chain (Hc)                                       | Plasma Membrane     | other                             |
| CNNM1    | CNNM1    | cyclin and CBS domain divalent metal cation transport mediator 1 | Plasma Membrane     | other                             |
| COG3     | COG3     | component of oligomeric golgi complex 3                          | Cytoplasm           | transporter                       |
| COPA     | COPA     | coatamer protein complex subunit alpha                           | Cytoplasm           | transporter                       |
| CPSF6    | CPSF6    | cleavage and polyadenylation specific factor 6                   | Nucleus             | other                             |
| CREB1    | CREB1    | cAMP responsive element binding protein 1                        | Nucleus             | transcription regulator           |
| CTNBL1   | CTNBL1   | catenin beta like 1                                              | Nucleus             | other                             |
| CYFIP2   | CYFIP2   | cytoplasmic FMR1 interacting protein 2                           | Cytoplasm           | other                             |
| DACT3    | DACT3    | dishevelled-binding antagonist of beta-catenin 3                 | Cytoplasm           | other                             |
| DCAF16   | DCAF16   | DDB1 and CUL4 associated factor 16                               | Other               | other                             |
| DGKZ     | DGKZ     | diacylglycerol kinase zeta                                       | Cytoplasm           | kinase                            |
| DLG5     | DLG5     | discs, large homolog 5 (Drosophila)                              | Plasma Membrane     | other                             |
| DNAH6    | DNAH6    | dynein, axonemal, heavy chain 6                                  | Extracellular Space | other                             |
| DNHD1    | DNHD1    | dynein heavy chain domain 1                                      | Cytoplasm           | other                             |
| DNTTIP1  | DNTTIP1  | deoxynucleotidyltransferase, terminal, interacting protein 1     | Nucleus             | ligand-dependent nuclear receptor |
| EIF4G3   | EIF4G3   | eukaryotic translation initiation factor 4 gamma, 3              | Cytoplasm           | translation regulator             |
| ELMO3    | ELMO3    | engulfment and cell motility 3                                   | Cytoplasm           | other                             |
| ENO2     | ENO2     | enolase 2 (gamma, neuronal)                                      | Cytoplasm           | enzyme                            |
| FAH      | FAH      | fumarylacetoacetate hydrolase (fumarylacetoacetase)              | Cytoplasm           | enzyme                            |
| FAM151A  | FAM151A  | family with sequence similarity 151 member A                     | Extracellular Space | other                             |
| FBXL6    | FBXL6    | F-box and leucine-rich repeat protein 6                          | Other               | enzyme                            |
| FDPS     | FDPS     | farnesyl diphosphate synthase                                    | Cytoplasm           | enzyme                            |
| FGA      | FGA      | fibrinogen alpha chain                                           | Extracellular Space | other                             |
| FIS1     | FIS1     | fission, mitochondrial 1                                         | Cytoplasm           | other                             |
| FLNA     | FLNA     | filamin A                                                        | Cytoplasm           | other                             |
| FLNB     | FLNB     | filamin B                                                        | Cytoplasm           | other                             |
| FMN2     | FMN2     | formin 2                                                         | Cytoplasm           | other                             |
| GABRA3   | GABRA3   | gamma-aminobutyric acid (GABA) A receptor, alpha 3               | Plasma Membrane     | ion channel                       |
| GANAB    | GANAB    | glucosidase, alpha; neutral AB                                   | Cytoplasm           | enzyme                            |
| GIPC1    | GIPC1    | GIPC PDZ domain containing family member 1                       | Cytoplasm           | other                             |
| GLI1     | GLI1     | GLI family zinc finger 1                                         | Nucleus             | transcription regulator           |
| GLTPD2   | GLTPD2   | glycolipid transfer protein domain containing 2                  | Other               | other                             |
| GP2      | GP2      | glycoprotein 2                                                   | Cytoplasm           | other                             |
| GPATCH8  | GPATCH8  | G-patch domain containing 8                                      | Other               | other                             |
| GRIA2    | GRIA2    | glutamate receptor, ionotropic, AMPA 2                           | Plasma Membrane     | ion channel                       |
| GRIA3    | GRIA3    | glutamate receptor, ionotropic, AMPA 3                           | Plasma Membrane     | ion channel                       |
| GRIA4    | GRIA4    | glutamate receptor, ionotropic, AMPA 4                           | Plasma Membrane     | ion channel                       |
| GRIK1    | GRIK1    | glutamate receptor, ionotropic, kainate 1                        | Plasma Membrane     | ion channel                       |
| GRIK2    | GRIK2    | glutamate receptor, ionotropic, kainate 2                        | Plasma Membrane     | ion channel                       |
| GRM4     | GRM4     | glutamate receptor, metabotropic 4                               | Plasma Membrane     | G-protein coupled receptor        |
| GRM6     | GRM6     | glutamate receptor, metabotropic 6                               | Plasma Membrane     | G-protein coupled receptor        |
| GSTM5    | GSTM5    | glutathione S-transferase mu 5                                   | Cytoplasm           | enzyme                            |
| HLTF     | HLTF     | helicase-like transcription factor                               | Nucleus             | transcription regulator           |
| HTR2C    | HTR2C    | 5-hydroxytryptamine (serotonin) receptor 2C, G protein-coupled   | Plasma Membrane     | G-protein coupled receptor        |
| HTR4     | HTR4     | 5-hydroxytryptamine (serotonin) receptor 4, G protein-coupled    | Plasma Membrane     | G-protein coupled receptor        |
| IARS     | IARS     | isoleucyl-tRNA synthetase                                        | Cytoplasm           | enzyme                            |
| IGFBP7   | IGFBP7   | insulin like growth factor binding protein 7                     | Extracellular Space | transporter                       |
| IL18BP   | IL18BP   | interleukin 18 binding protein                                   | Extracellular Space | other                             |
| INHBA    | INHBA    | inhibin beta A                                                   | Extracellular Space | growth factor                     |

|         |         |                                                                    |                     |                                   |
|---------|---------|--------------------------------------------------------------------|---------------------|-----------------------------------|
| INTS5   | INTS5   | integrator complex subunit 5                                       | Nucleus             | other                             |
| KCNA1   | KCNA1   | potassium channel, voltage gated shaker related subfamily A        | Plasma Membrane     | ion channel                       |
| KCNMA1  | KCNMA1  | potassium channel, calcium activated large conductance             | Plasma Membrane     | ion channel                       |
| KCNQ5   | KCNQ5   | potassium channel, voltage gated KQT-like subfamily Q              | Plasma Membrane     | ion channel                       |
| LEMD2   | LEMD2   | LEM domain containing 2                                            | Nucleus             | other                             |
| FAM211A | LRRC75A | leucine rich repeat containing 75A                                 | Other               | other                             |
| MAGIX   | MAGIX   | MAGI family member, X-linked                                       | Other               | other                             |
| MED21   | MED21   | mediator complex subunit 21                                        | Nucleus             | transcription regulator           |
| MEX3B   | MEX3B   | mex-3 RNA binding family member B                                  | Other               | kinase                            |
| MFN1    | MFN1    | mitofusin 1                                                        | Cytoplasm           | enzyme                            |
|         | MIIP    | migration and invasion inhibitory protein                          | Other               | other                             |
| MLLT10  | MLLT10  | myeloid/lymphoid or mixed-lineage leukemia; translocated to, 10    | Nucleus             | transcription regulator           |
| MOV10   | MOV10   | Mov10 RISC complex RNA helicase                                    | Nucleus             | enzyme                            |
| NARF    | NARF    | nuclear prelamin A recognition factor                              | Nucleus             | enzyme                            |
| NCSTN   | NCSTN   | nicastrin                                                          | Plasma Membrane     | peptidase                         |
| NEIL1   | NEIL1   | nei-like DNA glycosylase 1                                         | Nucleus             | enzyme                            |
| NOVA1   | NOVA1   | neuro-oncological ventral antigen 1                                | Nucleus             | other                             |
| OSGEP   | OSGEP   | O-sialoglycoprotein endopeptidase                                  | Other               | peptidase                         |
| PDCD7   | PDCD7   | programmed cell death 7                                            | Nucleus             | other                             |
| PGLYRP1 | PGLYRP1 | peptidoglycan recognition protein 1                                | Plasma Membrane     | transmembrane receptor            |
| PI4K2A  | PI4K2A  | phosphatidylinositol 4-kinase type 2 alpha                         | Cytoplasm           | kinase                            |
| PLCH2   | PLCH2   | phospholipase C eta 2                                              | Cytoplasm           | enzyme                            |
| PNMT    | PNMT    | phenylethanolamine N-methyltransferase                             | Cytoplasm           | enzyme                            |
| POLDIP3 | POLDIP3 | polymerase (DNA-directed), delta interacting protein 3             | Nucleus             | other                             |
| PRKAR2A | PRKAR2A | protein kinase, cAMP-dependent, regulatory subunit type II alpha   | Cytoplasm           | kinase                            |
| PRSS48  | PRSS48  | protease, serine 48                                                | Other               | other                             |
| PTPRN2  | PTPRN2  | protein tyrosine phosphatase, receptor type N2                     | Plasma Membrane     | phosphatase                       |
| RARA    | RARA    | retinoic acid receptor, alpha                                      | Nucleus             | ligand-dependent nuclear receptor |
| RIC3    | RIC3    | RIC3 acetylcholine receptor chaperone                              | Cytoplasm           | other                             |
| RICTOR  | RICTOR  | RPTOR independent companion of MTOR, complex 2                     | Cytoplasm           | other                             |
| RIN3    | RIN3    | Ras and Rab interactor 3                                           | Cytoplasm           | other                             |
| RRNAD1  | RRNAD1  | ribosomal RNA adenine dimethylase domain containing 1              | Other               | other                             |
| SH3BP2  | SH3BP2  | SH3-domain binding protein 2                                       | Cytoplasm           | other                             |
| SIX5    | SIX5    | SIX homeobox 5                                                     | Nucleus             | transcription regulator           |
| SLC22A6 | SLC22A6 | solute carrier family 22 (organic anion transporter), member 6     | Plasma Membrane     | transporter                       |
| SLC47A2 | SLC47A2 | solute carrier family 47 (multidrug and toxin extrusion), member 2 | Plasma Membrane     | transporter                       |
| FAM178A | SLF2    | SMC5-SMC6 complex localization factor 2                            | Extracellular Space | other                             |
| SON     | SON     | SON DNA binding protein                                            | Nucleus             | other                             |
| SPSB3   | SPSB3   | splA/ryanodine receptor domain and SOCS box containing 3           | Other               | other                             |
| SS18L1  | SS18L1  | synovial sarcoma translocation gene on chromosome 18-like 1        | Nucleus             | transcription regulator           |
| STXBP1  | STXBP1  | syntaxin binding protein 1                                         | Cytoplasm           | transporter                       |
| SYNE3   | SYNE3   | spectrin repeat containing, nuclear envelope family member 3       | Nucleus             | other                             |
| TMEM43  | TMEM43  | transmembrane protein 43                                           | Nucleus             | other                             |
| TMEM63B | TMEM63B | transmembrane protein 63B                                          | Plasma Membrane     | other                             |
| TOR1B   | TOR1B   | torsin family 1, member B (torsin B)                               | Cytoplasm           | enzyme                            |
| TRMT2B  | TRMT2B  | tRNA methyltransferase 2 homolog B                                 | Cytoplasm           | enzyme                            |
| TTL3    | TTL3    | tubulin tyrosine ligase like 3                                     | Extracellular Space | enzyme                            |
| UNC80   | UNC80   | unc-80 homolog, NALCN activator                                    | Plasma Membrane     | enzyme                            |
| USO1    | USO1    | USO1 vesicle transport factor                                      | Cytoplasm           | transporter                       |
| USP31   | USP31   | ubiquitin specific peptidase 31                                    | Nucleus             | peptidase                         |
| VNN2    | VNN2    | vanin 2                                                            | Other               | enzyme                            |
| XKR6    | XKR6    | X-linked Kx blood group related 6                                  | Other               | other                             |
| ZMYM6   | ZMYM6   | zinc finger, MYM-type 6                                            | Nucleus             | other                             |
| ZNF184  | ZNF184  | zinc finger protein 184                                            | Nucleus             | other                             |
| ZNF233  | ZNF233  | zinc finger protein 233                                            | Nucleus             | other                             |
| ZNF235  | ZNF235  | zinc finger protein 235                                            | Nucleus             | other                             |
| ZNF283  | ZNF283  | zinc finger protein 283                                            | Nucleus             | other                             |
| ZNF358  | ZNF358  | zinc finger protein 358                                            | Nucleus             | other                             |
| ZNF397  | ZNF397  | zinc finger protein 397                                            | Nucleus             | transcription regulator           |
| ZNF426  | ZNF426  | zinc finger protein 426                                            | Nucleus             | other                             |
| ZNF493  | ZNF493  | zinc finger protein 493                                            | Nucleus             | other                             |
| ZNF551  | ZNF551  | zinc finger protein 551                                            | Nucleus             | other                             |
| ZNF582  | ZNF582  | zinc finger protein 582                                            | Other               | other                             |
| ZNF586  | ZNF586  | zinc finger protein 586                                            | Other               | other                             |
| ZNF626  | ZNF626  | zinc finger protein 626                                            | Other               | other                             |
| ZNF785  | ZNF785  | zinc finger protein 785                                            | Other               | other                             |
| ZNF813  | ZNF813  | zinc finger protein 813                                            | Other               | other                             |
| ZNF891  | ZNF891  | zinc finger protein 891                                            | Other               | other                             |
